# Supplementary material for: Csp3–H bond activation mediated by a Pd(ii) complex under mild conditions
Source: Royal Society of Chemistry journal article supplement (doi:10.1039/d4qi01017e), 2024-01-01
Supplement: d4qi01017e1.pdf [file d4qi01017e1.pdf]

## Supplementary Information

### **Csp<sup>3</sup>-H Bond Activation Mediated by a Pd(II) Complex under Mild Conditions**

Hanah Na,<sup>a,b,#</sup> Andrew J. Wessel,<sup>c,#</sup> SeoungTae Kim,<sup>d,e,#</sup> Mu-Hyun Baik,<sup>d,e,\*</sup> and Liviu M. Mirica<sup>a,\*</sup>

<sup>a</sup> Department of Chemistry, University of Illinois at Urbana-Champaign, 600 S. Mathews Avenue, Urbana, Illinois, 61801

<sup>b</sup> Center for Advanced Specialty Chemicals, Korea Research Institute of Chemical Technology (KRICT), Ulsan 44412, Republic of Korea

<sup>c</sup> Department of Chemistry, Washington University, St. Louis, Missouri, 63130-4899

<sup>d</sup> Department of Chemistry, Korea Advanced Institute of Science and Technology (KAIST), Daejeon 34141, Republic of Korea

<sup>e</sup> Center for Catalytic Hydrocarbon Functionalizations, Institute for Basic Science (IBS), Daejeon 34141, Republic of Korea

<sup>#</sup> These authors contributed equally.

\* Email: mbaik2805@kaist.ac.kr

\* Email: mirica@illinois.edu

#### **Table of contents**

|                                               |     |
|-----------------------------------------------|-----|
| 1. General specifications .....               | S2  |
| 2. Synthesis .....                            | S3  |
| 3. NMR spectra .....                          | S7  |
| 4. Cyclic voltammograms of Pd complexes ..... | S13 |
| 5. C-H activation studies .....               | S14 |
| 6. X-ray structure Characterization.....      | S19 |
| 7. Computational Details .....                | S29 |
| 8. References.....                            | S57 |

## 1. General specifications

**Materials.** Reactions were performed in ambient conditions unless otherwise stated. Solvents were purified prior to use by passing through a column of activated alumina using an M Braun solvent purification system. All starting materials and reagents, unless otherwise specified, were obtained from commercial sources and used without further purification.

**Physical Methods.**  $^1\text{H-NMR}$  spectra (300.121 MHz) were recorded on a Varian Mercury-300 spectrometer or a Varian Unity Inova-500 spectrometer. EPR spectra were recorded on a JEOL JES-FA X-band (9.2GHz) EPR spectrometer at 77K. EPR spectra simulation and analysis were performed using Bruker WINEPR SimFonia program, version 1.25. ESI-MS experiments were performed using a Thermo FT or Bruker Maxis Q-TOF mass spectrometer with an electrospray ionization source. Elemental analyses were carried out by Intertek Pharmaceutical Service. Cyclic voltammetry (CV) experiments were performed with a BASi EC Epsilon electrochemical workstation or a CHI 660D Electrochemical Analyzer. Electrochemical-grade  $\text{Bu}_4\text{NClO}_4$  (Fluka) was used as the supporting electrolyte. Electrochemical measurements were performed under a blanket of nitrogen, and the analyzed solutions were de-aerated by purging with nitrogen. A glassy carbon disk electrode ( $d = 1.6 \text{ mm}$ ) was used as the working electrode, and either a Ag/AgCl wire electrode or a non-aqueous reference electrode (BASi) was used as the reference electrode. The reference electrodes were calibrated against ferrocene,  $\text{Cp}_2\text{Fe}$  (Fc). *Caution! Perchlorate salts are potentially explosive and should be handled with appropriate care and only in small quantities.*

## 2. Synthesis

Reactions were performed in ambient conditions unless otherwise stated. Solvents were purified prior to use by passing through a column of activated alumina using an MBraun solvent purification system. All starting materials and reagents, unless otherwise specified, were obtained from commercial sources and used without further purification. The starting material *N*-(tosyl)-2,11-diaza[3,3](2,6)pyridinophane ( $\text{Ts}^{\text{H}}\text{N4}$ ) was synthesized following our previously published procedure.<sup>1</sup>

### Synthesis of ligands

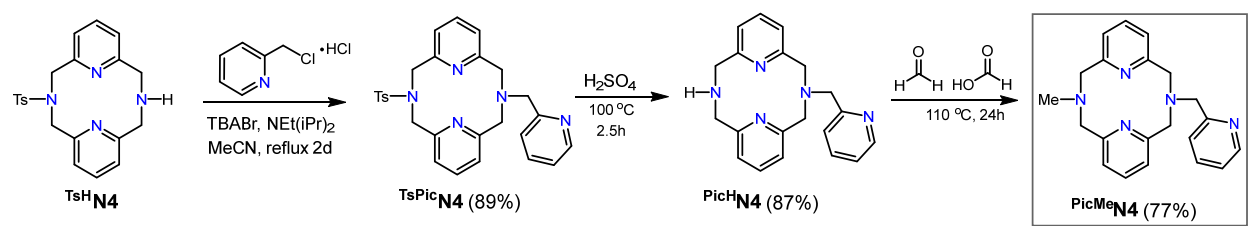

**Scheme S1.** Synthesis of  $\text{Pic}^{\text{CH}_3}\text{N4}$  ligand

### Synthesis of $\text{TsPicN4}$

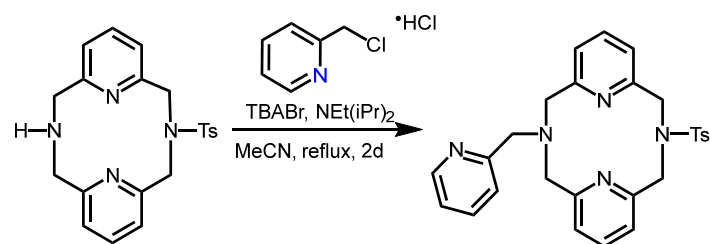

Under  $\text{N}_2$ ,  $\text{Ts}^{\text{H}}\text{N4}$  (1.96 g, 4.97 mmol) was suspended in diisopropylethylamine (1.75 mL, 14.4 mmol) and MeCN (200 mL) in a 500 mL round bottom flask. To this, 2-(chloromethyl)pyridine hydrochloride (1.12 g, 8.67 mmol) and a catalytic amount of tetrabutylammonium bromide (0.020 g) was added, and the resulting solution was refluxed for two days. After cooling with ice bath, the solution was basified with NaOH solution until a pH of 13 was reached. Then the aqueous layer was extracted with  $\text{CH}_2\text{Cl}_2$  ( $3 \times 500$  mL), the combined organic layer was dried with  $\text{K}_2\text{CO}_3$ , and the solvent was removed by rotary evaporation. The resulting tan-colored solid was dried under a vacuum. Yield:  $\text{TsPicN4}$  (2.16 g, 89%).  $^1\text{H}$  NMR (300 MHz,  $\text{CD}_3\text{CN}$ ): 8.548 (d, 2 H), 7.830 (d, 2 H), 7.795 (m, 4 H), 7.454 (d, 2 H), 7.248 (m, 3 H), 6.8995 (d of d, 4 H), 4.437 (s, 4 H), 4.127 (s, 2 H), 3.856 (s, 4 H), 2.467 (s, 3 H).  $^{13}\text{C}$  (125 MHz,  $\text{CD}_3\text{CN}$ ): 155.553, 154.772, 143.589, 137.205,

136.850, 135.996, 135.692, 129.965, 129.696, 127.277, 126.964, 123.237, 121.060, 56.541, 54.208, 21.505. ESI-MS ( $m/z$ ):  $[M + H]^+$  calcd for  $C_{27}H_{27}N_5O_2S$ , 486.1885; found, 486.1909.

### Synthesis of Pic<sup>H</sup>N4

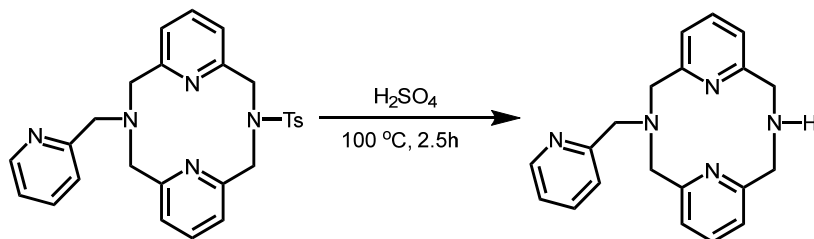

Under  $N_2$ ,  $TsPicN4$  (2.98 g, 6.14 mmol) was dissolved in 90% sulfuric acid (65 mL). This mixture was refluxed at 100 °C for 2.5 hours. After cooling, the solution was diluted with 50 mL of DI water. In an ice bath, a saturated solution of NaOH was added to basify until the pH of 13 was reached. The resulting solution was extracted with  $CH_2Cl_2$  ( $3 \times 500$  mL), the combined organic layer was dried with  $K_2CO_3$ , and filtered. The filtrate was concentrated to give a white solid. Yield:  $PicH4N4$  (1.77 g, 87%).  $^1H$  NMR (300 MHz,  $CDCl_3$ ): 8.586 (d, 2 H), 7.740 (m, 4 H), 7.209 (m, 1 H), 7.058 (t, 2 H), 6.693 (d, 2H), 6.478 (d, 2 H), 4.182 (s, 2 H), 3.963 (s, 4 H), 3.905 (s, 4 H);  $^{13}C$  (125 MHz,  $CDCl_3$ ): 159.348, 158.667, 136.374, 135.621, 120.611, 119.649, 55.892 54.588. ESI-MS ( $m/z$ ):  $[M + H]^+$  calcd for  $C_{20}H_{21}N_5$ , 332.1797; found, 332.1870.

### Synthesis of Pic<sup>CH3</sup>N4

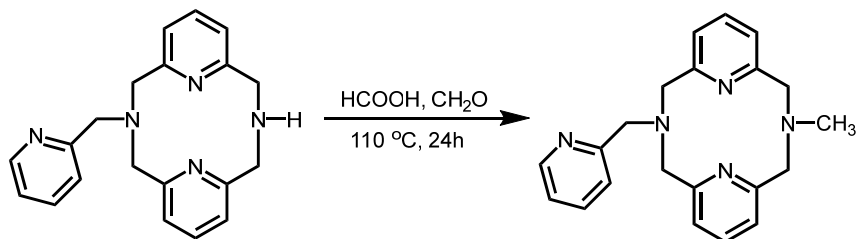

Under  $N_2$ ,  $PicH4N4$  (1.77 g, 5.34 mmol) was dissolved in concentrated formic acid (150 mL) and 40% formaldehyde solution (15 mL). This mixture was stirred and refluxed at 110 °C for 24 hours. After 24 hours, the reaction mixture was removed from the heat and 15 mL of 1 M HCl solution was stirred in. The solution was stirred for an additional 30 minutes. The solution was then concentrated to dryness via rotary evaporation, and the residue was basified using KOH. The basic aqueous fraction was extracted with DCM, and organic layers were combined and dried with  $K_2CO_3$ . The organic layer was then concentrated to dryness to give a white residue. This residue was purified

by hot heptane extraction (3 × 500 mL) or soxhlet extraction with heptane (500 mL). The solution was concentrated under reduced pressure to yield a white powder. Yield:  $\text{Pic}^{\text{CH}_3}\text{N}_4$  (1.4 g, 77%).  $^1\text{H}$  NMR (500 MHz,  $\text{CDCl}_3$ ): 8.61 (dt,  $J = 4.9, 1.4$  Hz, 1H), 7.76 (dd,  $J = 6.3, 1.7$  Hz, 2H), 7.22 (ddd,  $J = 6.1, 4.8, 2.5$  Hz, 1H), 7.13 (t,  $J = 7.6$  Hz, 2H), 6.80 – 6.75 (m, 4H), 4.18 (s, 2H), 4.00 (s, 4H), 3.84 (s, 4H), 2.72 (s, 3H);  $^1\text{H}$  NMR (300 MHz,  $\text{CD}_3\text{CN}$ ): 8.564 (d, 2 H), 7.689 (m, 4 H), 7.182 (m, 3 H), 6.806 (d of d, 4 H), 4.145 (s, 2 H), 4.001 (s, 4 H), 3.852 (s, 4 H), 2.694 (s, 3 H).  $^{13}\text{C}$  (125 MHz,  $\text{CDCl}_3$ ): 159.62, 157.45, 157.03, 149.17, 136.43, 135.33, 123.25, 122.51, 122.38, 122.14, 77.18, 76.93, 76.67, 66.09, 65.71, 63.63, 49.07. ESI-MS ( $m/z$ ):  $[\text{M} + \text{H}]^+$  calcd for  $\text{C}_{21}\text{H}_{23}\text{N}_5$ , 346.1952; found, 346.2029.

### Synthesis of $\text{Pic}^{\text{CD}_3}\text{N}_4$

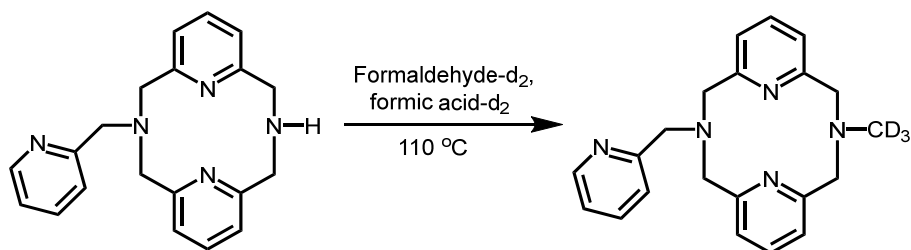

Under  $\text{N}_2$ ,  $\text{Pic}^{\text{H}}\text{N}_4$  (600 mg, 1.1 mmol), 20% formaldehyde- $\text{d}_2$  in  $\text{D}_2\text{O}$  (1.8 mL, 6 mmol) and formic acid- $\text{d}_2$  (0.9 mL, 25 mmol) was refluxed overnight. After cooling, 37%  $\text{HCl}$  (0.55 mL) was added to the reaction mixture, and the solvent removed under reduced pressure. The residue was basified with aqueous  $\text{NaOH}$  and extracted with  $\text{DCM}$ . The organic layer was dried over anhydrous  $\text{K}_2\text{CO}_3$ , filtered, and concentrated in vacuo to dryness. The tan crude was purified via hot heptane extraction to yield a white powder. Yield:  $\text{Pic}^{\text{CD}_3}\text{N}_4$  (412 mg, 65%). Note: The starting material  $\text{Pic}^{\text{H}}\text{N}_4$  was carefully dried to make sure no  $\text{H}_2\text{O}$  is present. To ensure no  $\text{H}_2\text{O}$  was present,  $\text{D}_2\text{O}$  was added to the  $\text{Pic}^{\text{H}}\text{N}_4$  and left to dry under reduced pressure.  $^1\text{H}$  NMR (300 MHz,  $\text{CDCl}_3$ ): 8.48 (d,  $J = 4.9$  Hz, 2H), 7.64 (dd,  $J = 5.0, 2.3$  Hz, 3H), 7.10 (dt,  $J = 5.5, 2.6$  Hz, 2H), 7.01 (s, 3H), 6.68 – 6.64 (m, 6H), 3.87 (d,  $J = 6.7$  Hz, 2H), 3.70 (d,  $J = 7.3$  Hz, 2H). Note: We observed partial extra deuteration of the aliphatic  $-\text{CH}_2-$  backbone of the ligand, as suggested by ESI-MS and  $^2\text{H}$ -NMR, although we washed  $\text{Pic}^{\text{H}}\text{N}_4$  ligand with  $\text{D}_2\text{O}$  prior to the reaction. We suspect that the deuterium exchange occurs during the acidic methylation, as picolyl pyridine may act as a weak base to aid the exchange reaction under this condition.

### Synthesis of [(Pic<sup>CH<sub>2</sub></sup>N<sub>4</sub>)Pd<sup>II</sup>]BF<sub>4</sub> (**1**)

The Pic<sup>CH<sub>3</sub></sup>N<sub>4</sub> (30.8 mg, 0.09 mmol) and [(MeCN)<sub>4</sub>Pd<sup>II</sup>](BF<sub>4</sub>)<sub>2</sub> (40.0 mg, 0.09 mmol) were added to a 20 mL vial with 1 mL of MeCN and the color immediately changed from two white solids to a yellow solution. The reaction was stirred in the dark overnight. The solution mixture was concentrated down to a yellow oil. Pentane was added to this yellow oil which was stirred for two days to precipitate. The solid was filtered off using a pipet filter, rinsed with more pentane, dried under vacuum, and weighed. Additional purification through crystallization was achieved, and yellow-orange crystals were obtained by adding two equivalents of Na(BPh<sub>4</sub>)<sub>2</sub> to solution of MeCN and complex with diethyl ether diffusion at room temperature (22.2 mg, 40.0%). <sup>1</sup>H NMR (500 MHz, CD<sub>3</sub>CN): 8.52 (dt, *J* = 5.3, 1.8 Hz, 1H), 7.97 (tq, *J* = 7.7, 1.5 Hz, 1H), 7.56 – 7.45 (m, 2H), 7.31 (ddt, *J* = 9.6, 7.6, 1.6 Hz, 2H), 6.87 (dd, *J* = 7.6, 2.5 Hz, 2H), 6.79 (dd, *J* = 7.6, 2.5 Hz, 2H), 4.48 (d, *J* = 2.3 Hz, 2H), 4.41 (dd, *J* = 14.8, 2.5 Hz, 2H), 4.04 (d, *J* = 16.1 Hz, 2H), 4.01 (s, 1H), 3.97 (s, 2H), 3.95-3.97 (3H). <sup>13</sup>C NMR (151 MHz, CD<sub>3</sub>CN): 161.34, 153.11, 149.91, 139.52, 138.78, 136.82, 126.66, 125.93, 125.78, 123.09, 123.05, 122.85, 122.81, 122.50, 66.11, 65.00, 64.97, 62.03, 58.01. ESI-MS (*m/z*): calcd for [C<sub>21</sub>H<sub>22</sub>N<sub>5</sub>Pd]<sup>+</sup> 450.0913; found, 450.0912. Elemental analysis: found 39.90%; H, 3.29%; N, 10.83%; C<sub>21</sub>H<sub>23</sub>B<sub>2</sub>F<sub>8</sub>N<sub>5</sub>Pd: C, 40.33%; H, 3.71%; N, 11.20%.

### Synthesis of [(Pic<sup>CH<sub>3</sub></sup>N<sub>4</sub>)Pd<sup>II</sup>(OAc)]OAc (**2**)

The Pic<sup>CH<sub>3</sub></sup>N<sub>4</sub> (20 mg, 0.058 mmol) and Pd<sup>II</sup>(OAc)<sub>2</sub> (13 mg, 0.058 mmol) were added to a 20 mL vial with 8 mL of THF and the color immediately changed from to a dark green. The reaction was stirred overnight. The resulting solid was filtered off using a pipet filter (cotton plug), and washed with THF. Collected THF solution was concentrated and pentane was added to precipitate a green solid. Yield: 14.2 mg, 43 %. <sup>1</sup>H NMR (499 MHz, CD<sub>3</sub>CN) δ 8.47 (d, *J* = 5.7 Hz, 1H), 8.16 (td, *J* = 7.8, 1.6 Hz, 1H), 7.69 – 7.62 (m, 2H), 7.46 (t, *J* = 7.7 Hz, 2H), 7.04 (d, *J* = 7.9 Hz, 2H), 6.98 (d, *J* = 7.6 Hz, 2H), 4.92 (s, 4H), 4.22 (t, *J* = 13.2 Hz, 4H), 3.89 (d, *J* = 13.2 Hz, 2H), 2.76 (s, 3H), 1.88 (d, *J* = 1.3 Hz, 3H), 1.76 (s, 3H). <sup>13</sup>C NMR (126 MHz, CD<sub>3</sub>CN) δ 177.19, 150.29, 142.14, 140.31, 139.33, 126.52, 125.97, 124.89, 123.58, 123.54, f123.52, 123.43, 70.60, 68.74, 64.94, 54.75, 48.64, 23.28, 22.63. Attempts to obtain analytically pure solid samples of **2** were not successful, likely to the slow C-H activation process occurring during the isolation of the product.

### 3. NMR spectra

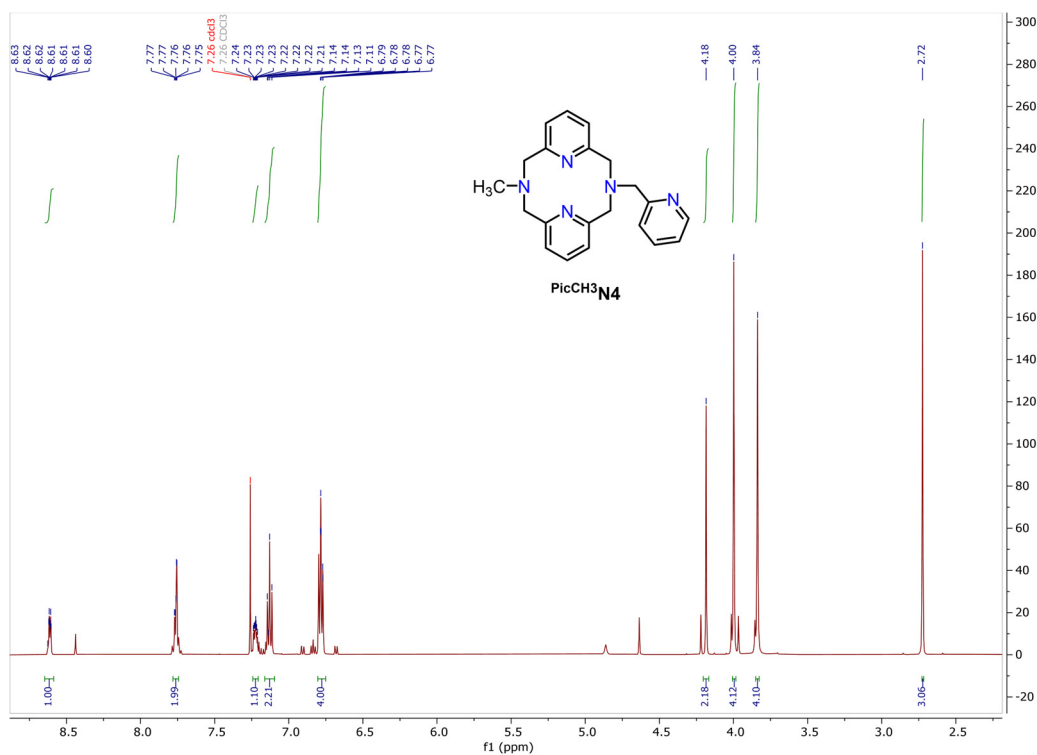

Figure S1. <sup>1</sup>H NMR spectrum of PicCH<sub>3</sub>N<sub>4</sub>, recorded at 500 MHz in CDCl<sub>3</sub>.

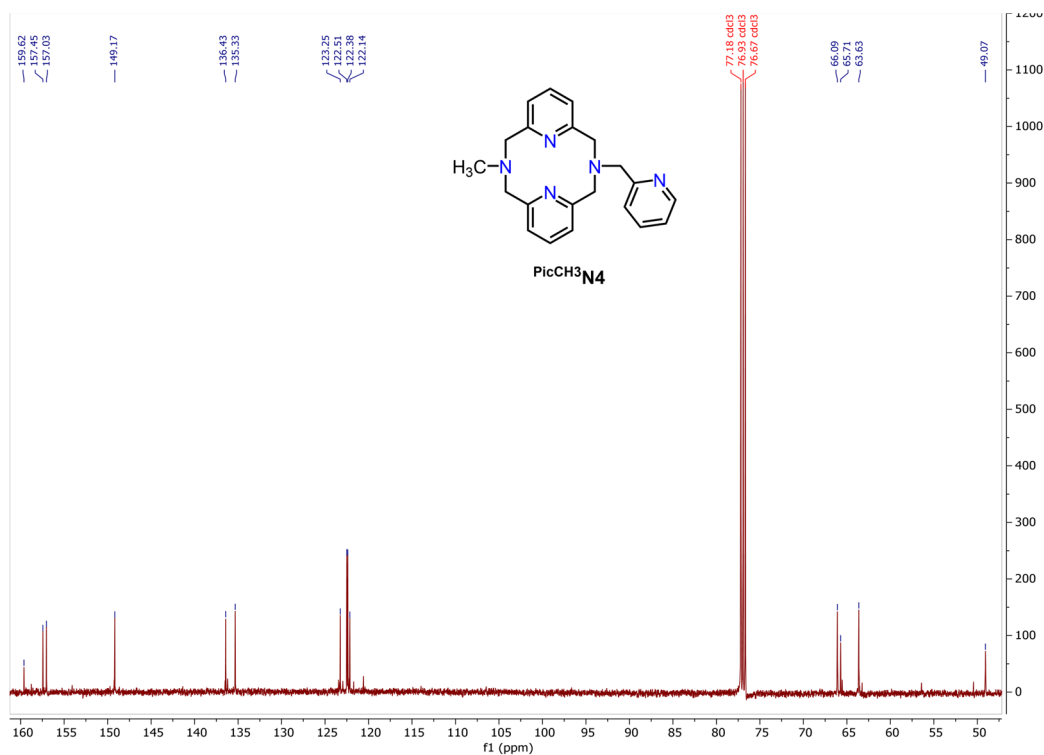

Figure S2. <sup>13</sup>C NMR spectrum of PicCH<sub>3</sub>N<sub>4</sub>, recorded at 126 MHz in CDCl<sub>3</sub>.

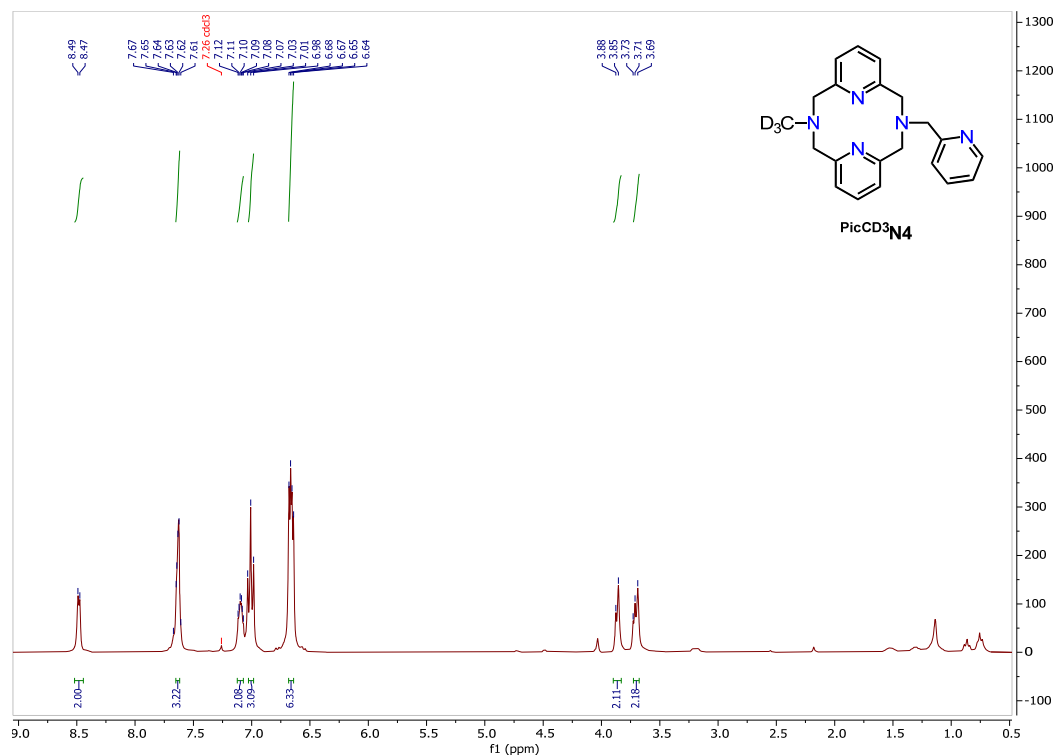

**Figure S3.** <sup>1</sup>H NMR spectrum of PicCD<sub>3</sub>N<sub>4</sub> recorded at 300 MHz in CDCl<sub>3</sub>, showing the absence of CH<sub>3</sub> peak.

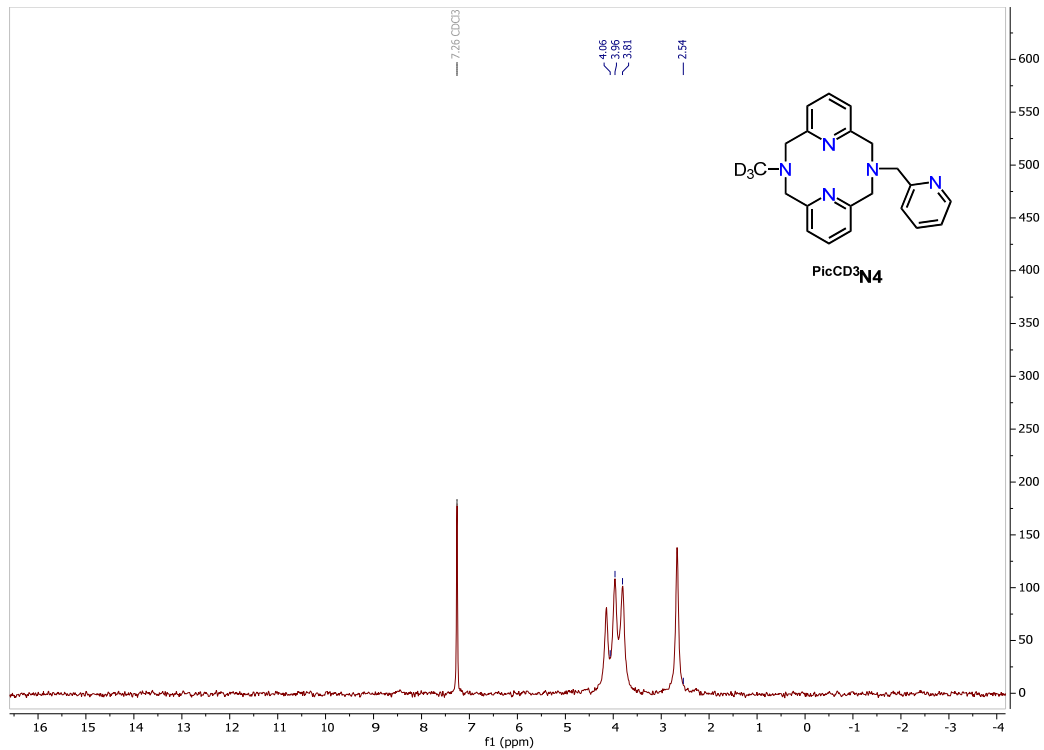

**Figure S4.** <sup>2</sup>H NMR spectrum of PicCD<sub>3</sub>N<sub>4</sub>, recorded at 500 MHz in CHCl<sub>3</sub>, showing deuteration of aliphatic -CH<sub>2</sub>- groups of the pyridinophane macrocycle (at ~4 ppm).



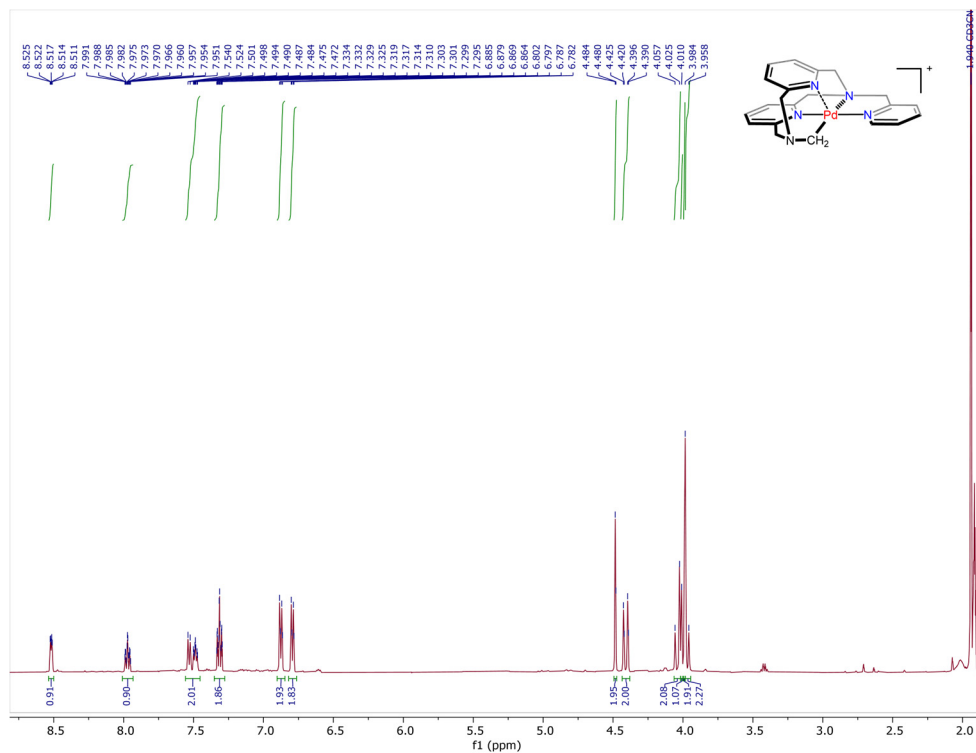

Figure S5.  $^1\text{H}$  NMR spectrum of  $[(\text{PicCH}_2\text{N}_4)\text{Pd}^{\text{II}}]\text{BF}_4$  (1) recorded at 500 MHz in  $\text{CD}_3\text{CN}$ .

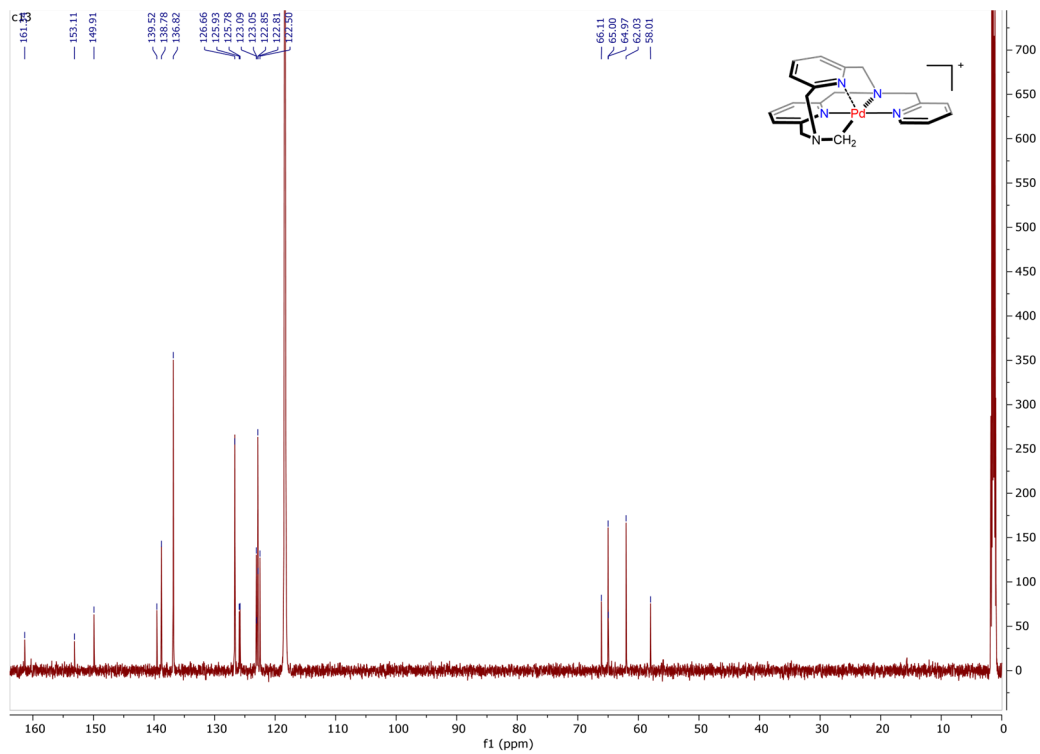

Figure S6.  $^{13}\text{C}$  NMR spectrum of  $[(\text{PicCH}_2\text{N}_4)\text{Pd}^{\text{II}}]\text{BF}_4$  (1) recorded at 151 MHz in  $\text{CD}_3\text{CN}$ .

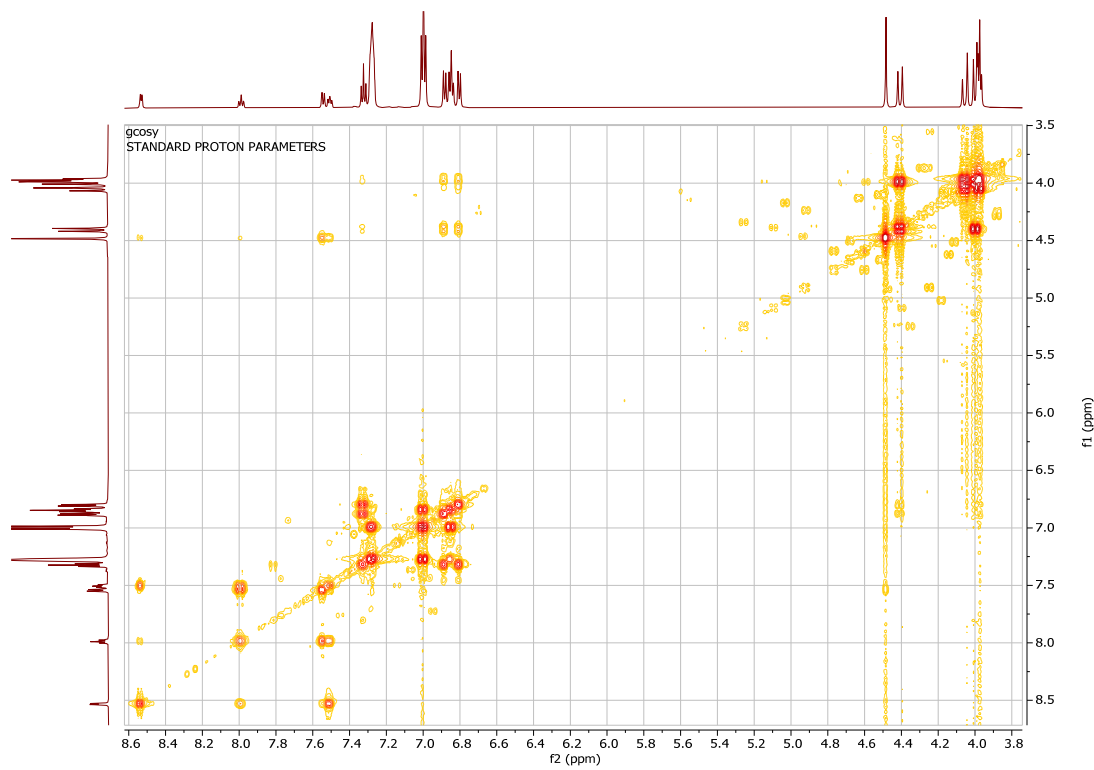

Figure S7.  $^1\text{H}$ - $^1\text{H}$  gCOSY NMR spectrum of  $[(^{\text{PicCH}_2\text{N}_4})\text{Pd}^{\text{II}}]\text{BF}_4$  (**1**).

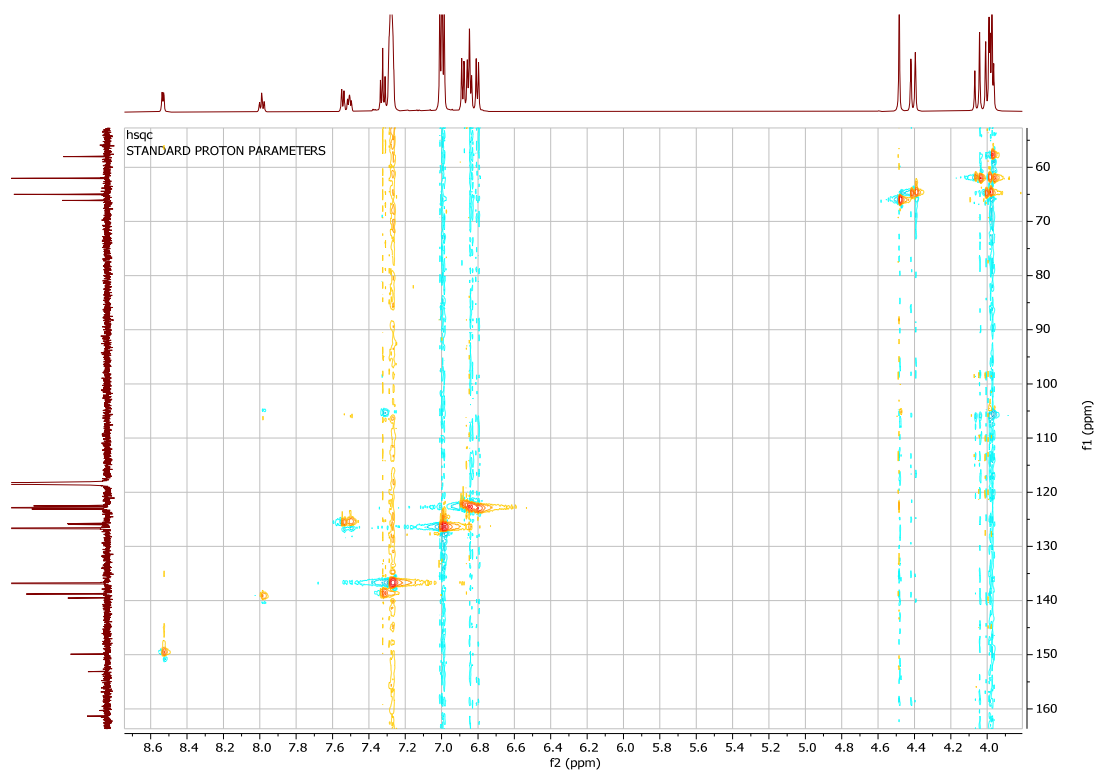

Figure S8.  $^1\text{H}$ - $^{13}\text{C}$  HSQC NMR spectrum of  $[(^{\text{PicCH}_2\text{N}_4})\text{Pd}^{\text{II}}]\text{BF}_4$  (**1**).

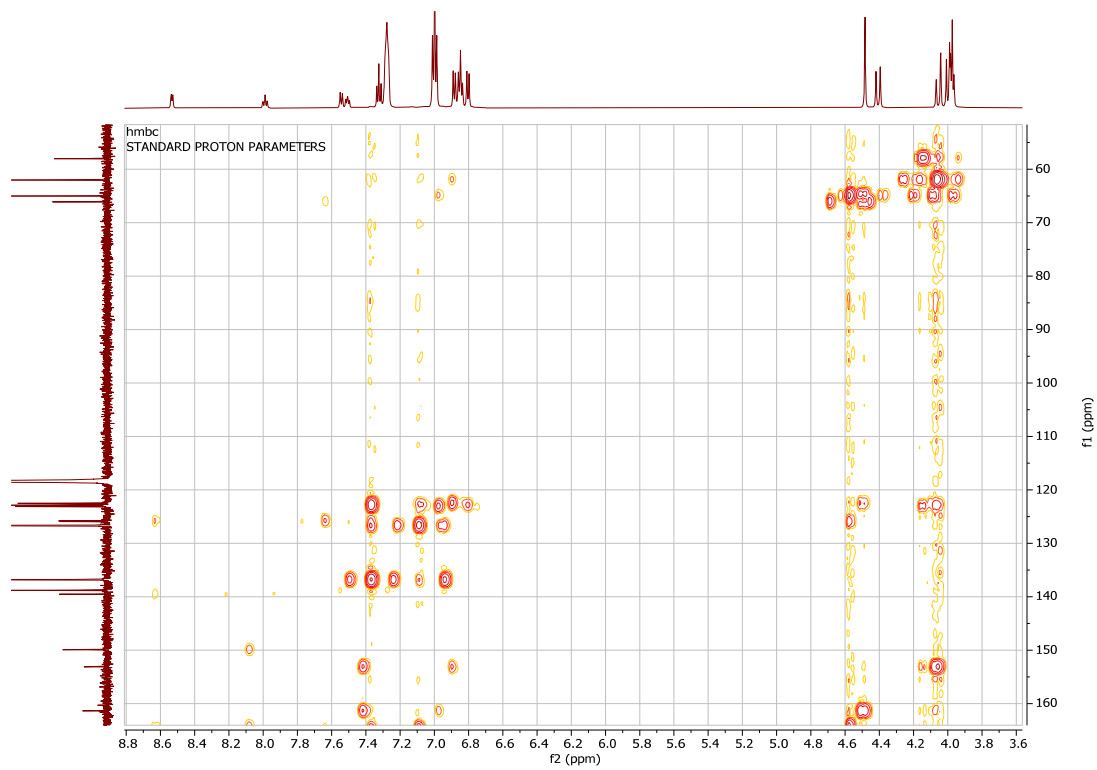

**Figure S9.**  $^1\text{H}$ - $^{13}\text{C}$  HMBC NMR spectrum of  $[(\text{PicCH}_2\text{N}_4)\text{Pd}^{\text{II}}]\text{BF}_4$  (**1**).

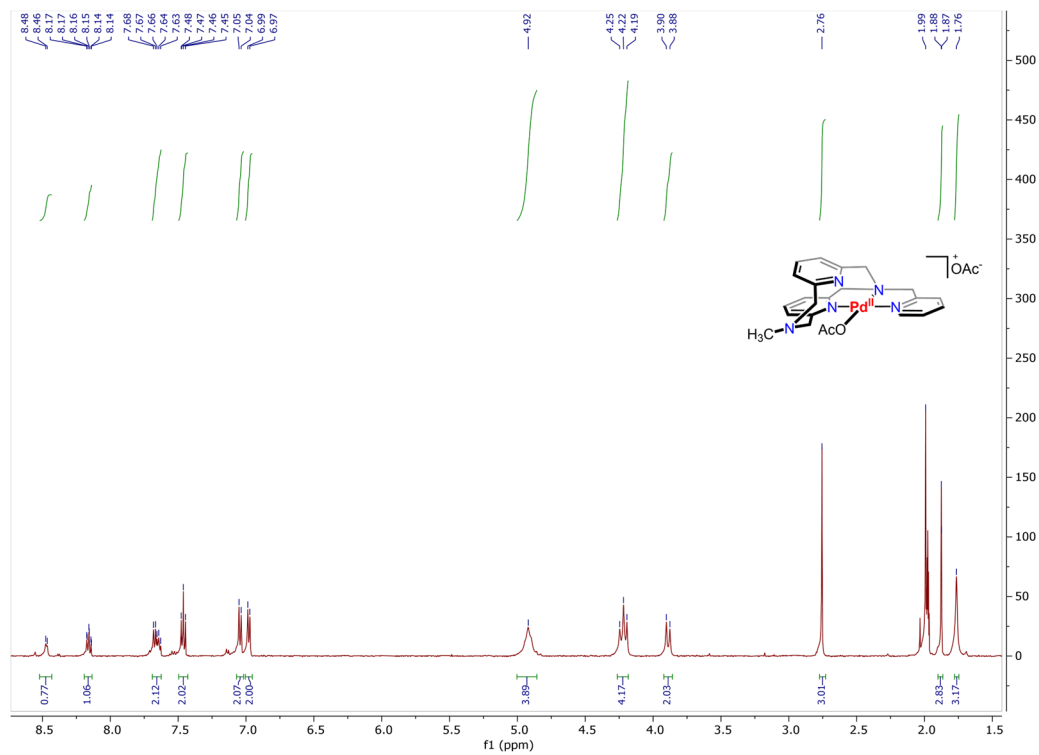

**Figure S10.**  $^1\text{H}$  NMR spectrum of  $[(\text{PicCH}_3\text{N}_4)\text{Pd}^{\text{II}}(\text{OAc})]\text{OAc}$  (**2**) recorded at 500 MHz in  $\text{CD}_3\text{CN}$ .

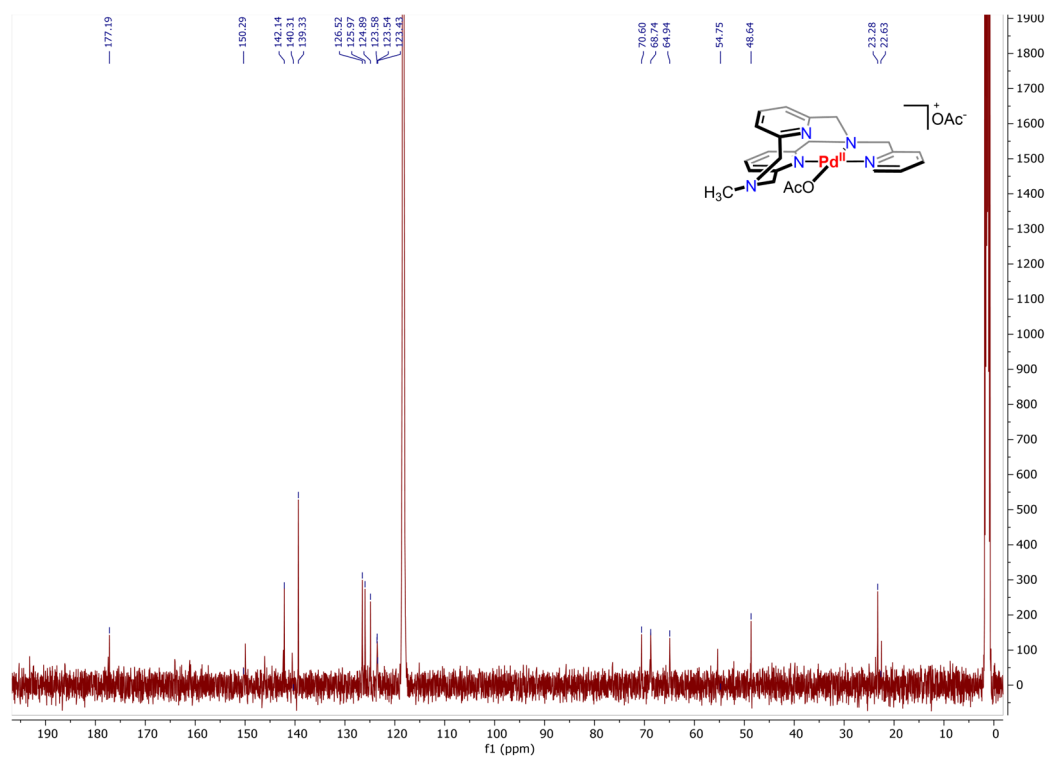

**Figure S 11.**  $^{13}\text{C}$  NMR spectrum of  $[(\text{Pic}^{\text{CH}_3}\text{N}_4)\text{Pd}^{\text{II}}(\text{OAc})]\text{OAc}$  (**2**) recorded at 151 MHz in  $\text{CD}_3\text{CN}$ .

#### 4. Cyclic voltammograms of Pd complexes

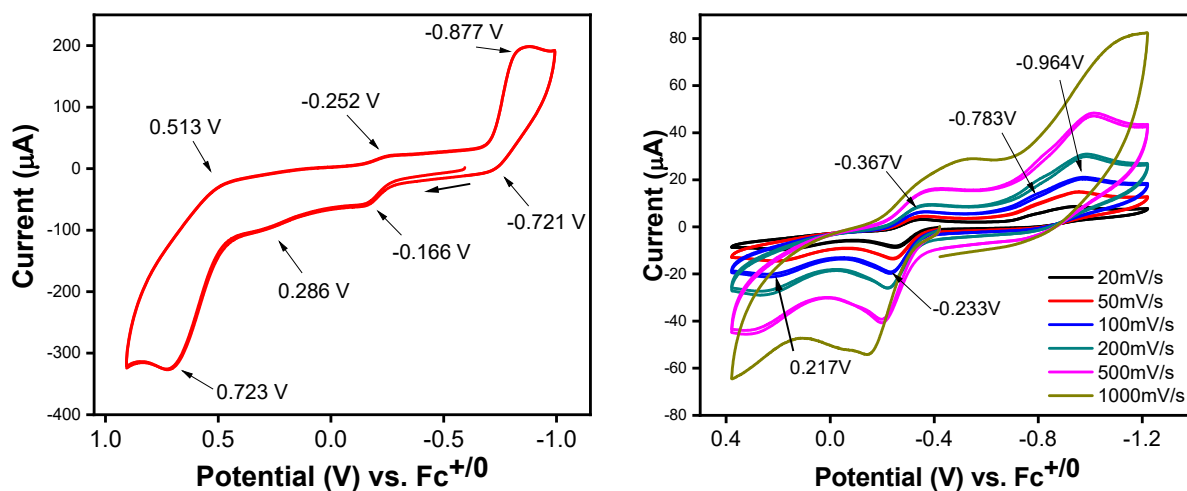

**Figure S12.** Cyclic voltammograms of  $[(\text{PicCH}_2\text{N}_4)\text{Pd}^{\text{II}}]\text{BF}_4$  (**1**), recorded at room temperature in 0.1 M  $\text{Bu}_4\text{NClO}_4$  MeCN at 100 mV/s scan rate (left) and variable scan rate (right).

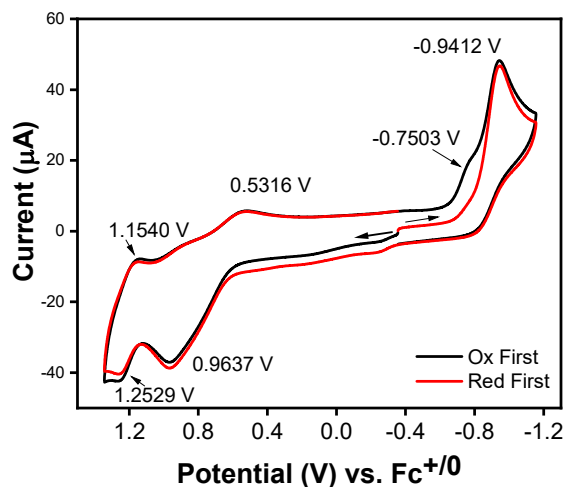

**Figure S13.** Cyclic voltammograms of *in-situ* generated  $[(\text{PicCH}_3\text{N}_4)\text{Pd}^{\text{II}}]\text{BF}_4$  (pre-activation), recorded at room temperature in 0.1 M  $\text{Bu}_4\text{NClO}_4$  MeCN at scan rate 100 mV/s.

## 5. C–H activation studies

### **General procedures for the C–H activation studies in presence or absence of acetate: KIE determination and Eyring analysis**

All kinetic experiments were monitored by  $^1\text{H}$  and  $^2\text{H}$  NMR spectroscopy. In a  $\text{N}_2$ -filled glove box, a solution of 5 mg of  $^{\text{PicCH}_3}\text{N}_4$  and 1 equiv NaOAc (or without any acetate) in 0.6 mL of  $\text{MeCN-d}_3$  was added into a J. Young NMR tube containing 1  $\mu\text{L}$  of tetramethylsilane as an internal standard. A ligand-only NMR was taken as a background at this point. Then, to the ligand solution 1 equiv of  $[(\text{MeCN})_4\text{Pd}^{\text{II}}](\text{BF}_4)_2$  dissolved in 0.1 mL  $\text{MeCN-d}_3$  was injected, to generate a solution with a final concentration of 20 mM in Pd complex. The NMR tubes were taken out of the box and then kept at 63  $^\circ\text{C}$  and mixed vigorously to form a homogeneous solution, and then periodically monitored by a  $^1\text{H}$  NMR array until no additional changes were observed. The average product yields and initial rates from at least three independent experiments were determined by NMR integration.

A similar procedure was performed for  $^2\text{H}$  NMR studies. A solution of 5 mg of  $^{\text{PicCD}_3}\text{N}_4$  in 0.6 mL of  $\text{MeCN}$  was added to a J. Young tube, along with 1 equiv of NaOAc. The internal standard used was 1  $\mu\text{L}$  of benzene- $\text{d}_6$ . The  $^2\text{H}$  NMR was taken initially for the ligand-only solution. Four-hundred scans were compiled with a one second delay time for each of the  $^2\text{H}$  NMR spectra. The J. Young tube was brought back into a glovebox and 1 equiv of  $[(\text{MeCN})_4\text{Pd}^{\text{II}}](\text{BF}_4)_2$  dissolved in 0.1 mL  $\text{MeCN}$  was added, to generate a solution with a final concentration of 20 mM in Pd complex. The tubes were kept at 63  $^\circ\text{C}$  and mixed vigorously to form a homogeneous solution, and then monitored by the  $^2\text{H}$  NMR array. For determining the product yield and the initial rate values, the methylene peak at  $\sim 4.5$  ppm for  $^1\text{H}$  NMR and  $^2\text{H}$  NMR was integrated. The average product yields and the initial rates from at least three independent experiments were determined by NMR integration. Data fitting and analysis was performed with the software OriginPro.

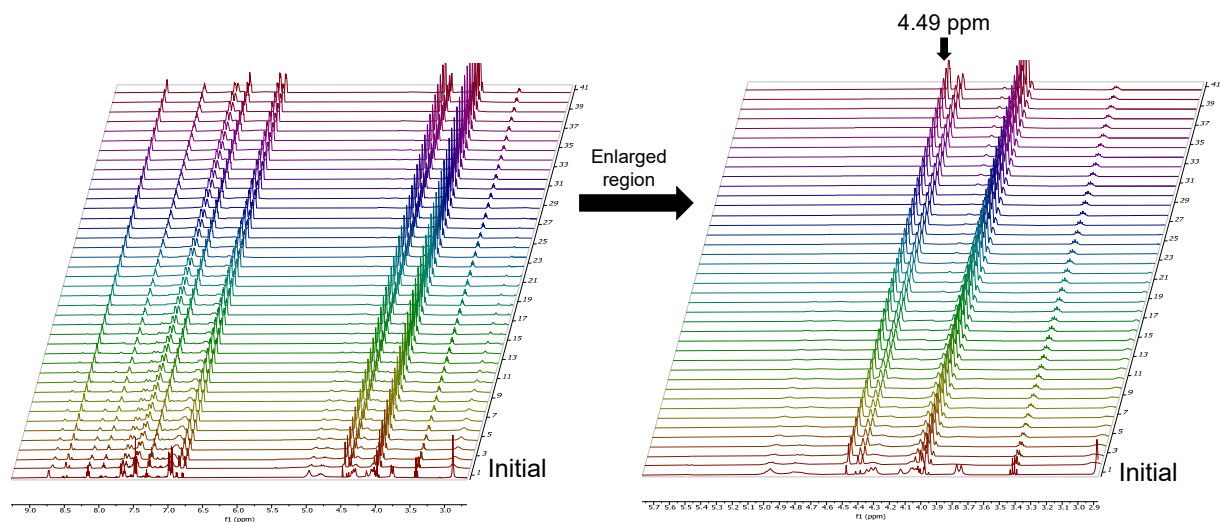

**Figure S14.** Representative time-resolved  $^1\text{H}$  NMR spectra of reaction between  $\text{PicCH}_3\text{N}_4$  and  $[\text{Pd}(\text{MeCN})_4](\text{BF}_4)_2$  in the presence of NaOAc at  $63^\circ\text{C}$ . Peak at 4.49 ppm was integrated for yield determination.

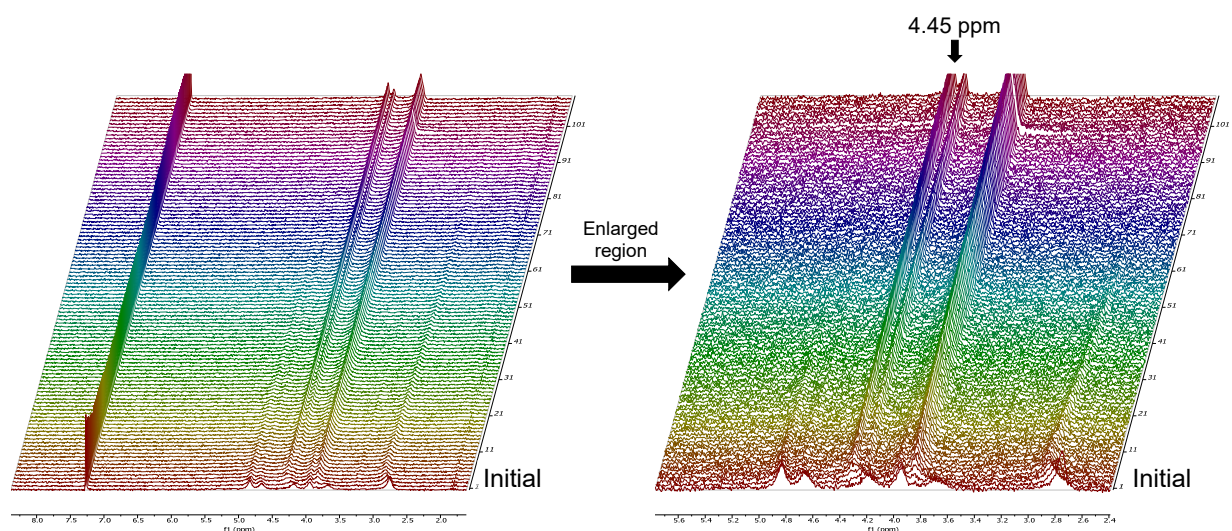

**Figure S15.** Representative time-resolved  $^2\text{H}$  NMR spectra of reaction between  $\text{PicCD}_3\text{N}_4$  and  $[\text{Pd}(\text{MeCN})_4](\text{BF}_4)_2$  in the presence of NaOAc at  $63^\circ\text{C}$ . Peak at 4.45 ppm was integrated for yield determination.

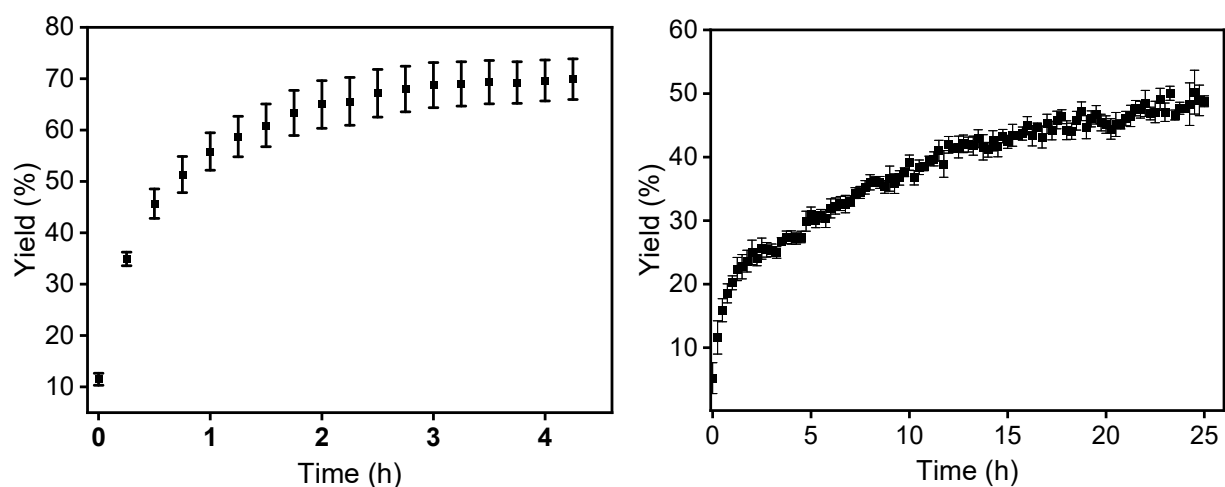

**Figure S16.** Representative kinetic traces for the reaction of (left)  $\text{PicCH}_3\text{N}_4$  or (right)  $\text{PicCD}_3\text{N}_4$  and  $[\text{Pd}(\text{MeCN})_4](\text{BF}_4)_2$  in the presence of NaOAc (collected at 63 °C), showing the formation of the C-H activated product, as monitored by  $^1\text{H}$  NMR (left) and  $^2\text{H}$  NMR (right). Initial rate analysis was performed to obtain the KIE value for this transformation. Note: The reaction of  $\text{PicCD}_3\text{N}_4$  with  $[\text{Pd}(\text{MeCN})_4](\text{BF}_4)_2$  takes longer times to reach completion, thus the initial rate method was employed.

**Table S1.** Initial rates for C-H activated product formation, obtained for  $[(\text{PicCH}_3\text{N}_4)\text{Pd}^{\text{II}}]^{2+}$  and  $[(\text{PicCD}_3\text{N}_4)\text{Pd}^{\text{II}}]^{2+}$  in MeCN in the presence of NaOAc at 63 °C, and KIE value and standard error determination.<sup>2</sup>

| Complex                                                  | Initial rate ( $\text{M h}^{-1}$ ) | Average (standard error) | KIE (standard error) <sup>2</sup> |
|----------------------------------------------------------|------------------------------------|--------------------------|-----------------------------------|
| $[(\text{PicCH}_3\text{N}_4)\text{Pd}^{\text{II}}]^{2+}$ | 0.015                              | 0.0153 (0.0003)          | <b>2.28 (0.39)</b>                |
|                                                          | 0.0152                             |                          |                                   |
|                                                          | 0.0156                             |                          |                                   |
| $[(\text{PicCD}_3\text{N}_4)\text{Pd}^{\text{II}}]^{2+}$ | 0.006                              | 0.0067 (0.0011)          |                                   |
|                                                          | 0.0061                             |                          |                                   |
|                                                          | 0.008                              |                          |                                   |



## Eyring analysis

The plot of  $\ln(k/T)$  as a function of  $1/T$  was fitted according to the expression:

$$\ln \frac{k}{T} = -\frac{\Delta H^\ddagger}{R} \cdot \frac{1}{T} + \ln \frac{k_B}{h} + \frac{\Delta S^\ddagger}{R}$$

The enthalpy ( $\Delta H^\ddagger$ ) and entropy ( $\Delta S^\ddagger$ ) of activation were extracted from the slope and intercept, respectively.

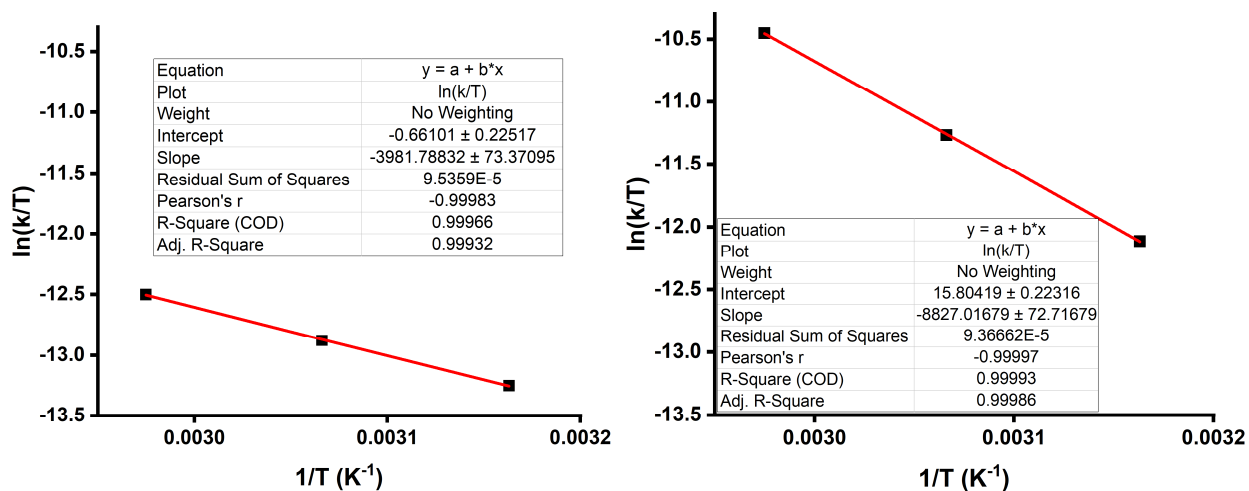

**Figure S17.** Eyring plots for the generation of **1** obtained from initial rate analysis (left) in absence of NaOAc and (right) in presence of NaOAc.

## Effect of additives

### General procedure for the C–H activation study with various additives

All experiments were monitored by NMR spectroscopy. In N<sub>2</sub>-filled glove box, a solution of 5 mg of <sup>Pic</sup>CH<sub>3</sub>N<sub>4</sub> along with corresponding 1 equiv of additive in 0.6 mL of MeCN-d<sub>3</sub> was added into an NMR tube containing 1 μL of tetramethylsilane as an internal standard. A ligand-only NMR was taken as a background at this point. To this solution 6.4 mg of [(MeCN)<sub>4</sub>Pd<sup>II</sup>](BF<sub>4</sub>)<sub>2</sub> (1 equiv) dissolved in 0.1 mL MeCN-d<sub>3</sub> was injected in the glovebox. The reaction mixtures were mixed vigorously fully to form homogeneous solutions and the <sup>1</sup>H NMR was taken to obtain an initial spectrum. The additive was then added and the sample was then kept at a constant temperature and periodically monitored by a <sup>1</sup>H NMR at different time points.

**Table S2.** Conditions for C–H Activation reaction

| Additive                                 | Equiv. | <sup>Pic</sup> CH <sub>3</sub> /CD <sub>3</sub> N <sub>4</sub><br>H/D | Temp.<br>(°C) | Time<br>(h) | Formation of <b>1</b><br>(%) |
|------------------------------------------|--------|-----------------------------------------------------------------------|---------------|-------------|------------------------------|
| <b>Control</b>                           | NA     | H                                                                     | 25            | 60          | 40% <sup>a</sup>             |
|                                          | NA     | H                                                                     | 50            | 24          | 39% <sup>a</sup>             |
|                                          | NA     | H                                                                     | 70            | 24          | Decomp.                      |
|                                          | NA     | D                                                                     | 25            | 25          | Decomp.                      |
| <b>NaOAc</b>                             | 1      | H                                                                     | 25            | 73          | 43%                          |
|                                          | 1      | H                                                                     | 63            | 3           | 82%                          |
|                                          | 1      | D                                                                     | 63            | 24          | 80%                          |
| <b>1,8-bis(dimethylamino)naphthalene</b> | 1      | H                                                                     | 25            | 24          | 0% <sup>b</sup>              |
| <b>Lithium Hexamethyldisilazide</b>      | 1      | H                                                                     | 25            | 0.5         | Decomp.                      |
| <b>Tetramethylammonium mesylamide</b>    | 1      | H                                                                     | 25            | 0.5         | Decomp.                      |
| <b>CsOPiv</b>                            | 1      | H                                                                     | 25            | 60          | 0% <sup>b</sup>              |
|                                          | 1      | H                                                                     | 63            | 24          | 6%                           |
| <b>AgOAc</b>                             | 1      | H                                                                     | 25            | 60          | 0% <sup>b</sup>              |
|                                          | 1      | H                                                                     | 63            | 24          | 7%                           |
| <b>TBAOAc</b>                            | 1      | H                                                                     | 25            | 48          | 0% <sup>b</sup>              |
|                                          | 1      | H                                                                     | 63            | 48          | 0% <sup>b</sup>              |
|                                          | 0.5    | H                                                                     | 63            | 3           | 80%                          |
| <b>Pd(OAc)<sub>2</sub><sup>c</sup></b>   | 1      | H                                                                     | 25            | 60          | 0% <sup>b</sup>              |
|                                          | 1      | H                                                                     | 63            | 24          | 0% <sup>b</sup>              |
| <b>Pd(TFA)<sub>2</sub><sup>c</sup></b>   | 1      | H                                                                     | 25            | 24          | 0% <sup>b</sup>              |

<sup>a</sup> The formation of up to 40% of protonated <sup>Pic</sup>CH<sub>3</sub>N<sub>4</sub> ligand was observed by NMR. <sup>b</sup> Other palladium product observed other than starting material or **1**. <sup>c</sup> All trials were run with [(MeCN)<sub>4</sub>Pd<sup>II</sup>](BF<sub>4</sub>)<sub>2</sub> as the Pd source except for those with additive with alternative palladium sources: Pd(OAc)<sub>2</sub> and Pd(TFA)<sub>2</sub>. NA: Not Applicable.

## 6. X-ray structure Characterization

**General information:** Suitable crystals were mounted on MiTeGen cryoloops in random orientations in a Bruker Kappa Apex-II CCD X-ray diffractometer equipped with an Oxford Cryostream LT device and a fine focus Mo K $\alpha$  radiation X-ray source ( $\lambda = 0.71073 \text{ \AA}$ ). Preliminary unit cell constants were determined with a set of 36 narrow frame scans. Typical data sets consist of combinations of  $\omega$  and  $\phi$  scan frames with a typical scan width of  $0.5^\circ$  and a counting time of 15–30 s/frame at a crystal-to-detector distance of 4.0 cm. The collected frames were integrated using an orientation matrix determined from the narrow frame scans. Apex II and SAINT software packages (Bruker Analytical X-Ray, Madison, WI, 2008) were used for data collection and data integration. Analysis of the integrated data did not show any decay. Final cell constants were determined by global refinement of xyz centroids of reflections from the complete data sets. Collected data were corrected for systematic errors using SADABS (Bruker Analytical X-Ray, Madison, WI, 2008) based on the Laue symmetry using equivalent reflections. Crystal data and intensity data collection parameters are listed in Tables S3 and S4. Structure solutions and refinement were carried out using the SHELXTL-PLUS software package. The structures were solved by direct methods and refined successfully in specified crystal systems and space groups. Full matrix least-squares refinements were carried out by minimizing  $\sum w(F_o^2 - F_c^2)^2$ . The non-hydrogen atoms were refined anisotropically to convergence. Typically, the hydrogen atoms were treated using the appropriate riding model. The deposition numbers CCDC 2226270 (**1**) and -2226271 (**2**) at the Cambridge Crystallographic Data Centre CCDC contain the supplementary crystallographic data. These data are provided free of charge by the Cambridge Crystallographic Data Centre.

**X-ray structure determination of [(Pic<sup>CH2</sup>N4)Pd<sup>II</sup>]BF<sub>4</sub> (1).****Table S3.** Crystal data and structure refinement for [(Pic<sup>CH2</sup>N4)Pd<sup>II</sup>]BF<sub>4</sub> (1) (**Im8414**)

|                                   |                                                                    |                              |
|-----------------------------------|--------------------------------------------------------------------|------------------------------|
| Identification code               | 18414/lt/x8/AJW-N5Pd                                               |                              |
| Empirical formula                 | C <sub>21</sub> H <sub>22</sub> B F <sub>4</sub> N <sub>5</sub> Pd |                              |
| Formula weight                    | 537.64                                                             |                              |
| Temperature                       | 100(2) K                                                           |                              |
| Wavelength                        | 0.71073 Å                                                          |                              |
| Crystal system                    | Triclinic                                                          |                              |
| Space group                       | P $\bar{1}$                                                        |                              |
| Unit cell dimensions              | a = 8.2212(6) Å                                                    | $\alpha = 75.751(4)^\circ$ . |
|                                   | b = 11.0718(9) Å                                                   | $\beta = 89.961(5)^\circ$ .  |
|                                   | c = 12.3446(11) Å                                                  | $\gamma = 68.232(4)^\circ$ . |
| Volume                            | 1006.29(15) Å <sup>3</sup>                                         |                              |
| Z                                 | 2                                                                  |                              |
| Density (calculated)              | 1.774 Mg/m <sup>3</sup>                                            |                              |
| Absorption coefficient            | 0.979 mm <sup>-1</sup>                                             |                              |
| F(000)                            | 540                                                                |                              |
| Crystal size                      | 0.234 x 0.231 x 0.082 mm <sup>3</sup>                              |                              |
| Theta range for data collection   | 2.054 to 31.484°.                                                  |                              |
| Index ranges                      | -12 ≤ h ≤ 12, -16 ≤ k ≤ 16, -18 ≤ l ≤ 18                           |                              |
| Reflections collected             | 29820                                                              |                              |
| Independent reflections           | 6601 [R(int) = 0.0397]                                             |                              |
| Completeness to theta = 25.242°   | 99.9 %                                                             |                              |
| Absorption correction             | Semi-empirical from equivalents                                    |                              |
| Max. and min. transmission        | 0.8623 and 0.7767                                                  |                              |
| Refinement method                 | Full-matrix least-squares on F <sup>2</sup>                        |                              |
| Data / restraints / parameters    | 6601 / 21 / 290                                                    |                              |
| Goodness-of-fit on F <sup>2</sup> | 1.074                                                              |                              |
| Final R indices [I > 2σ(I)]       | R1 = 0.0245, wR2 = 0.0497                                          |                              |
| R indices (all data)              | R1 = 0.0260, wR2 = 0.0503                                          |                              |
| Extinction coefficient            | n/a                                                                |                              |
| Largest diff. peak and hole       | 0.684 and -0.771 e.Å <sup>-3</sup>                                 |                              |

**Table S4.** Bond length (Å) and angles (°) for [(<sup>Pic</sup>CH<sub>2</sub>N<sub>4</sub>)Pd<sup>II</sup>]BF<sub>4</sub> (**1**)

|           |             |           |           |
|-----------|-------------|-----------|-----------|
| Pd1—C7    | 2.017 (2)   | C8—C9     | 1.385 (3) |
| Pd1—N1    | 2.0633 (17) | C8—H8     | 0.9500    |
| Pd1—N2    | 2.0695 (18) | C9—C10    | 1.382 (4) |
| Pd1—N4    | 2.1677 (16) | C9—H9     | 0.9500    |
| Pd1—N3    | 2.5495 (16) | C10—C11   | 1.382 (3) |
| N1—C5     | 1.339 (3)   | C10—H10   | 0.9500    |
| N1—C1     | 1.354 (3)   | C11—C12   | 1.385 (3) |
| N2—C8     | 1.341 (3)   | C11—H11   | 0.9500    |
| N2—C12    | 1.361 (3)   | C12—C13   | 1.506 (3) |
| N3—C19    | 1.339 (3)   | C13—H13A  | 0.9900    |
| N3—C15    | 1.344 (3)   | C13—H13B  | 0.9900    |
| N4—C21    | 1.473 (3)   | C14—C15   | 1.512 (3) |
| N4—C13    | 1.481 (3)   | C14—H14A  | 0.9900    |
| N4—C14    | 1.492 (3)   | C14—H14B  | 0.9900    |
| N5—C7     | 1.431 (3)   | C15—C16   | 1.382 (3) |
| N5—C6     | 1.444 (3)   | C16—C17   | 1.394 (3) |
| N5—C20    | 1.475 (3)   | C16—H16   | 0.9500    |
| C1—C2     | 1.382 (3)   | C17—C18   | 1.382 (4) |
| C1—C21    | 1.522 (3)   | C17—H17   | 0.9500    |
| C2—C3     | 1.386 (3)   | C18—C19   | 1.391 (3) |
| C2—H2     | 0.9500      | C18—H18   | 0.9500    |
| C3—C4     | 1.380 (3)   | C19—C20   | 1.523 (3) |
| C3—H3     | 0.9500      | C20—H20A  | 0.9900    |
| C4—C5     | 1.384 (3)   | C20—H20B  | 0.9900    |
| C4—H4     | 0.9500      | C21—H21A  | 0.9900    |
| C5—C6     | 1.525 (3)   | C21—H21B  | 0.9900    |
| C6—H6A    | 0.9900      | F1—B1     | 1.377 (3) |
| C6—H6B    | 0.9900      | F2—B1     | 1.395 (3) |
| C7—H7A    | 0.9900      | F3—B1     | 1.399 (3) |
| C7—H7B    | 0.9900      | F4—B1     | 1.385 (3) |
| <hr/>     |             |           |           |
| C7—Pd1—N1 | 92.67 (8)   | C10—C9—C8 | 119.2 (2) |
| C7—Pd1—N2 | 104.11 (8)  | C10—C9—H9 | 120.4     |
| N1—Pd1—N2 | 162.35 (6)  | C8—C9—H9  | 120.4     |

|            |             |               |             |
|------------|-------------|---------------|-------------|
| C7—Pd1—N4  | 166.28 (7)  | C9—C10—C11    | 118.8 (2)   |
| N1—Pd1—N4  | 82.85 (7)   | C9—C10—H10    | 120.6       |
| N2—Pd1—N4  | 81.99 (7)   | C11—C10—H10   | 120.6       |
| C7—Pd1—N3  | 89.68 (7)   | C10—C11—C12   | 119.2 (2)   |
| N1—Pd1—N3  | 77.90 (6)   | C10—C11—H11   | 120.4       |
| N2—Pd1—N3  | 107.19 (6)  | C12—C11—H11   | 120.4       |
| N4—Pd1—N3  | 76.72 (6)   | N2—C12—C11    | 122.18 (19) |
| C5—N1—C1   | 120.19 (17) | N2—C12—C13    | 117.06 (18) |
| C5—N1—Pd1  | 127.94 (14) | C11—C12—C13   | 120.68 (19) |
| C1—N1—Pd1  | 111.86 (13) | N4—C13—C12    | 110.35 (16) |
| C8—N2—C12  | 117.82 (19) | N4—C13—H13A   | 109.6       |
| C8—N2—Pd1  | 129.46 (15) | C12—C13—H13A  | 109.6       |
| C12—N2—Pd1 | 112.04 (14) | N4—C13—H13B   | 109.6       |
| C19—N3—C15 | 118.61 (18) | C12—C13—H13B  | 109.6       |
| C19—N3—Pd1 | 110.44 (12) | H13A—C13—H13B | 108.1       |
| C15—N3—Pd1 | 100.38 (12) | N4—C14—C15    | 109.83 (16) |
| C21—N4—C13 | 114.22 (17) | N4—C14—H14A   | 109.7       |
| C21—N4—C14 | 113.59 (17) | C15—C14—H14A  | 109.7       |
| C13—N4—C14 | 110.68 (17) | N4—C14—H14B   | 109.7       |
| C21—N4—Pd1 | 104.31 (12) | C15—C14—H14B  | 109.7       |
| C13—N4—Pd1 | 104.17 (12) | H14A—C14—H14B | 108.2       |
| C14—N4—Pd1 | 109.12 (12) | N3—C15—C16    | 122.40 (19) |
| C7—N5—C6   | 115.65 (17) | N3—C15—C14    | 114.12 (18) |
| C7—N5—C20  | 118.36 (17) | C16—C15—C14   | 122.92 (18) |
| C6—N5—C20  | 115.93 (17) | C15—C16—C17   | 118.49 (19) |
| N1—C1—C2   | 120.6 (2)   | C15—C16—H16   | 120.8       |
| N1—C1—C21  | 118.49 (17) | C17—C16—H16   | 120.8       |
| C2—C1—C21  | 120.8 (2)   | C18—C17—C16   | 119.12 (19) |
| C1—C2—C3   | 119.0 (2)   | C18—C17—H17   | 120.4       |
| C1—C2—H2   | 120.5       | C16—C17—H17   | 120.4       |
| C3—C2—H2   | 120.5       | C17—C18—C19   | 118.7 (2)   |
| C4—C3—C2   | 119.86 (19) | C17—C18—H18   | 120.6       |
| C4—C3—H3   | 120.1       | C19—C18—H18   | 120.6       |
| C2—C3—H3   | 120.1       | N3—C19—C18    | 122.16 (19) |
| C3—C4—C5   | 118.6 (2)   | N3—C19—C20    | 115.59 (18) |
| C3—C4—H4   | 120.7       | C18—C19—C20   | 121.8 (2)   |

|            |             |               |             |
|------------|-------------|---------------|-------------|
| C5—C4—H4   | 120.7       | N5—C20—C19    | 114.40 (17) |
| N1—C5—C4   | 121.37 (19) | N5—C20—H20A   | 108.7       |
| N1—C5—C6   | 119.02 (18) | C19—C20—H20A  | 108.7       |
| C4—C5—C6   | 119.58 (19) | N5—C20—H20B   | 108.7       |
| N5—C6—C5   | 117.48 (17) | C19—C20—H20B  | 108.7       |
| N5—C6—H6A  | 107.9       | H20A—C20—H20B | 107.6       |
| C5—C6—H6A  | 107.9       | N4—C21—C1     | 113.30 (16) |
| N5—C6—H6B  | 107.9       | N4—C21—H21A   | 108.9       |
| C5—C6—H6B  | 107.9       | C1—C21—H21A   | 108.9       |
| H6A—C6—H6B | 107.2       | N4—C21—H21B   | 108.9       |
| N5—C7—Pd1  | 110.08 (13) | C1—C21—H21B   | 108.9       |
| N5—C7—H7A  | 109.6       | H21A—C21—H21B | 107.7       |
| Pd1—C7—H7A | 109.6       | F1—B1—F4      | 110.8 (2)   |
| N5—C7—H7B  | 109.6       | F1—B1—F2      | 109.98 (19) |
| Pd1—C7—H7B | 109.6       | F4—B1—F2      | 110.15 (18) |
| H7A—C7—H7B | 108.2       | F1—B1—F3      | 108.85 (18) |
| N2—C8—C9   | 122.7 (2)   | F4—B1—F3      | 109.38 (19) |
| N2—C8—H8   | 118.7       | F2—B1—F3      | 107.7 (2)   |
| C9—C8—H8   | 118.7       |               |             |

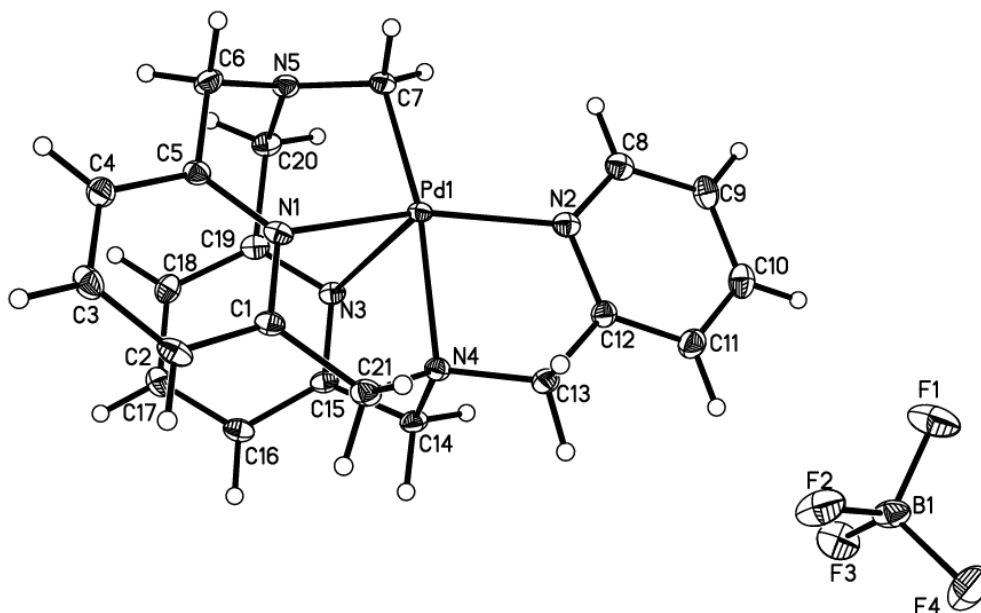

**Figure S18.** Projection view of of  $[(\text{PicCH}_2\text{N}_4)\text{Pd}^{\text{II}}]\text{BF}_4$  (**1**) with 50% probability thermal ellipsoids.

**X-ray structure determination of [(<sup>Pic</sup>CH<sub>3</sub>N<sub>4</sub>)Pd<sup>II</sup>OAc]OAc (2)****Table S5.** Crystal data and structure refinement for [(<sup>Pic</sup>CH<sub>3</sub>N<sub>4</sub>)Pd<sup>II</sup>OAc]OAc (2)

|                                   |                                                                  |                 |
|-----------------------------------|------------------------------------------------------------------|-----------------|
| Identification code               | 17317/lt/x8/AW-N5PdOac                                           |                 |
| Empirical formula                 | C <sub>31</sub> H <sub>41</sub> N <sub>5</sub> O <sub>7</sub> Pd |                 |
| Formula weight                    | 702.09                                                           |                 |
| Temperature                       | 99(2) K                                                          |                 |
| Wavelength                        | 0.71073 Å                                                        |                 |
| Crystal system                    | Monoclinic                                                       |                 |
| Space group                       | P2 <sub>1</sub> /n                                               |                 |
| Unit cell dimensions              | a = 7.9182(3) Å                                                  | α = 90°.        |
|                                   | b = 19.5779(9) Å                                                 | β = 94.348(2)°. |
|                                   | c = 20.2624(9) Å                                                 | γ = 90°.        |
| Volume                            | 3132.1(2) Å <sup>3</sup>                                         |                 |
| Z                                 | 4                                                                |                 |
| Density (calculated)              | 1.489 Mg/m <sup>3</sup>                                          |                 |
| Absorption coefficient            | 0.647 mm <sup>-1</sup>                                           |                 |
| F(000)                            | 1456                                                             |                 |
| Crystal size                      | 0.598 x 0.102 x 0.097 mm <sup>3</sup>                            |                 |
| Theta range for data collection   | 1.448 to 35.995°.                                                |                 |
| Index ranges                      | -8 ≤ h ≤ 12, -32 ≤ k ≤ 31, -32 ≤ l ≤ 32                          |                 |
| Reflections collected             | 108458                                                           |                 |
| Independent reflections           | 14216 [R(int) = 0.0562]                                          |                 |
| Completeness to theta = 25.242°   | 100.0 %                                                          |                 |
| Absorption correction             | Semi-empirical from equivalents                                  |                 |
| Max. and min. transmission        | 0.7471 and 0.6516                                                |                 |
| Refinement method                 | Full-matrix least-squares on F <sup>2</sup>                      |                 |
| Data / restraints / parameters    | 14216 / 3 / 402                                                  |                 |
| Goodness-of-fit on F <sup>2</sup> | 1.006                                                            |                 |
| Final R indices [I > 2σ(I)]       | R1 = 0.0351, wR2 = 0.0655                                        |                 |
| R indices (all data)              | R1 = 0.0624, wR2 = 0.0739                                        |                 |
| Largest diff. peak and hole       | 0.660 and -1.056 e.Å <sup>-3</sup>                               |                 |



**Table S6.** Bond length (Å) and angles (°) for [(<sup>Pic</sup>CH<sub>3</sub>N<sub>4</sub>)Pd<sup>II</sup>OAc]OAc (**2**)

|        |             |          |             |
|--------|-------------|----------|-------------|
| Pd1—N3 | 1.9940 (12) | C15—C16  | 1.5027 (19) |
| Pd1—O1 | 2.0191 (10) | C15—H15A | 0.9900      |
| Pd1—N4 | 2.0220 (12) | C15—H15B | 0.9900      |
| Pd1—N1 | 2.0432 (12) | C16—C17  | 1.383 (2)   |
| O1—C21 | 1.2990 (18) | C17—C18  | 1.387 (2)   |
| O2—C21 | 1.2256 (19) | C17—H17  | 0.9500      |
| N1—C1  | 1.3468 (19) | C18—C19  | 1.386 (2)   |
| N1—C5  | 1.3589 (18) | C18—H18  | 0.9500      |
| N2—C12 | 1.3342 (19) | C19—C20  | 1.381 (2)   |
| N2—C8  | 1.3474 (19) | C19—H19  | 0.9500      |
| N3—C20 | 1.3470 (18) | C20—H20  | 0.9500      |
| N3—C16 | 1.3529 (19) | C21—C22  | 1.512 (2)   |
| N4—C7  | 1.5036 (18) | C22—H22A | 0.9800      |
| N4—C15 | 1.5060 (18) | C22—H22B | 0.9800      |
| N4—C6  | 1.5070 (17) | C22—H22C | 0.9800      |
| N5—C23 | 1.470 (2)   | C23—H23A | 0.9800      |
| N5—C13 | 1.4723 (19) | C23—H23B | 0.9800      |
| N5—C14 | 1.4747 (19) | C23—H23C | 0.9800      |
| C1—C2  | 1.392 (2)   | O1S—C1S  | 1.424 (2)   |
| C1—C14 | 1.516 (2)   | O1S—C4S  | 1.428 (2)   |
| C2—C3  | 1.386 (2)   | C1S—C2S  | 1.520 (3)   |
| C2—H2  | 0.9500      | C1S—H1SA | 0.9900      |
| C3—C4  | 1.386 (2)   | C1S—H1SB | 0.9900      |
| C3—H3  | 0.9500      | C2S—C3S  | 1.540 (3)   |
| C4—C5  | 1.3820 (19) | C2S—H2SA | 0.9900      |
| C4—H4  | 0.9500      | C2S—H2SB | 0.9900      |
| C5—C6  | 1.506 (2)   | C3S—C4S  | 1.518 (3)   |
| C6—H6A | 0.9900      | C3S—H3SA | 0.9900      |
| C6—H6B | 0.9900      | C3S—H3SB | 0.9900      |
| C7—C8  | 1.506 (2)   | C4S—H4SA | 0.9900      |
| C7—H7A | 0.9900      | C4S—H4SB | 0.9900      |
| C7—H7B | 0.9900      | O3—C24   | 1.2384 (19) |
| C8—C9  | 1.386 (2)   | O4—C24   | 1.281 (2)   |
| C9—C10 | 1.393 (2)   | C24—C25  | 1.512 (2)   |
| C9—H9  | 0.9500      | C25—H25A | 0.9800      |

|          |           |          |           |
|----------|-----------|----------|-----------|
| C10—C11  | 1.380 (2) | C25—H25B | 0.9800    |
| C10—H10  | 0.9500    | C25—H25C | 0.9800    |
| C11—C12  | 1.399 (2) | O5—C26   | 1.298 (2) |
| C11—H11  | 0.9500    | O5—H5    | 0.8400    |
| C12—C13  | 1.508 (2) | O6—C26   | 1.225 (2) |
| C13—H13A | 0.9900    | C26—C27  | 1.503 (2) |
| C13—H13B | 0.9900    | C27—H27A | 0.9800    |
| C14—H14A | 0.9900    | C27—H27B | 0.9800    |
| C14—H14B | 0.9900    | C27—H27C | 0.9800    |

---

|            |             |               |             |
|------------|-------------|---------------|-------------|
| N3—Pd1—O1  | 90.14 (5)   | N4—C15—H15A   | 109.6       |
| N3—Pd1—N4  | 84.13 (5)   | C16—C15—H15B  | 109.6       |
| O1—Pd1—N4  | 171.82 (5)  | N4—C15—H15B   | 109.6       |
| N3—Pd1—N1  | 167.46 (5)  | H15A—C15—H15B | 108.1       |
| O1—Pd1—N1  | 102.01 (5)  | N3—C16—C17    | 120.72 (13) |
| N4—Pd1—N1  | 83.46 (5)   | N3—C16—C15    | 116.21 (12) |
| C21—O1—Pd1 | 116.03 (9)  | C17—C16—C15   | 122.90 (13) |
| C1—N1—C5   | 119.48 (12) | C16—C17—C18   | 119.33 (14) |
| C1—N1—Pd1  | 130.38 (10) | C16—C17—H17   | 120.3       |
| C5—N1—Pd1  | 110.02 (9)  | C18—C17—H17   | 120.3       |
| C12—N2—C8  | 118.02 (13) | C19—C18—C17   | 119.55 (14) |
| C20—N3—C16 | 119.99 (12) | C19—C18—H18   | 120.2       |
| C20—N3—Pd1 | 127.21 (10) | C17—C18—H18   | 120.2       |
| C16—N3—Pd1 | 112.79 (9)  | C20—C19—C18   | 118.69 (14) |
| C7—N4—C15  | 107.75 (11) | C20—C19—H19   | 120.7       |
| C7—N4—C6   | 112.84 (11) | C18—C19—H19   | 120.7       |
| C15—N4—C6  | 110.75 (11) | N3—C20—C19    | 121.61 (14) |
| C7—N4—Pd1  | 116.47 (9)  | N3—C20—H20    | 119.2       |
| C15—N4—Pd1 | 105.89 (8)  | C19—C20—H20   | 119.2       |
| C6—N4—Pd1  | 102.90 (8)  | O2—C21—O1     | 124.79 (14) |
| C23—N5—C13 | 108.70 (11) | O2—C21—C22    | 121.68 (14) |
| C23—N5—C14 | 108.89 (12) | O1—C21—C22    | 113.53 (13) |
| C13—N5—C14 | 112.61 (12) | C21—C22—H22A  | 109.5       |
| N1—C1—C2   | 120.22 (13) | C21—C22—H22B  | 109.5       |
| N1—C1—C14  | 119.96 (12) | H22A—C22—H22B | 109.5       |
| C2—C1—C14  | 119.78 (13) | C21—C22—H22C  | 109.5       |

|             |             |               |             |
|-------------|-------------|---------------|-------------|
| C3—C2—C1    | 120.25 (14) | H22A—C22—H22C | 109.5       |
| C3—C2—H2    | 119.9       | H22B—C22—H22C | 109.5       |
| C1—C2—H2    | 119.9       | N5—C23—H23A   | 109.5       |
| C2—C3—C4    | 118.81 (14) | N5—C23—H23B   | 109.5       |
| C2—C3—H3    | 120.6       | H23A—C23—H23B | 109.5       |
| C4—C3—H3    | 120.6       | N5—C23—H23C   | 109.5       |
| C5—C4—C3    | 118.80 (14) | H23A—C23—H23C | 109.5       |
| C5—C4—H4    | 120.6       | H23B—C23—H23C | 109.5       |
| C3—C4—H4    | 120.6       | C1S—O1S—C4S   | 104.62 (13) |
| N1—C5—C4    | 121.88 (13) | O1S—C1S—C2S   | 105.68 (14) |
| N1—C5—C6    | 115.99 (12) | O1S—C1S—H1SA  | 110.6       |
| C4—C5—C6    | 122.13 (13) | C2S—C1S—H1SA  | 110.6       |
| C5—C6—N4    | 110.51 (11) | O1S—C1S—H1SB  | 110.6       |
| C5—C6—H6A   | 109.5       | C2S—C1S—H1SB  | 110.6       |
| N4—C6—H6A   | 109.5       | H1SA—C1S—H1SB | 108.7       |
| C5—C6—H6B   | 109.5       | C1S—C2S—C3S   | 103.28 (14) |
| N4—C6—H6B   | 109.5       | C1S—C2S—H2SA  | 111.1       |
| H6A—C6—H6B  | 108.1       | C3S—C2S—H2SA  | 111.1       |
| N4—C7—C8    | 112.17 (11) | C1S—C2S—H2SB  | 111.1       |
| N4—C7—H7A   | 109.2       | C3S—C2S—H2SB  | 111.1       |
| C8—C7—H7A   | 109.2       | H2SA—C2S—H2SB | 109.1       |
| N4—C7—H7B   | 109.2       | C4S—C3S—C2S   | 103.97 (14) |
| C8—C7—H7B   | 109.2       | C4S—C3S—H3SA  | 111.0       |
| H7A—C7—H7B  | 107.9       | C2S—C3S—H3SA  | 111.0       |
| N2—C8—C9    | 122.93 (14) | C4S—C3S—H3SB  | 111.0       |
| N2—C8—C7    | 115.43 (12) | C2S—C3S—H3SB  | 111.0       |
| C9—C8—C7    | 121.47 (13) | H3SA—C3S—H3SB | 109.0       |
| C8—C9—C10   | 118.68 (14) | O1S—C4S—C3S   | 106.07 (15) |
| C8—C9—H9    | 120.7       | O1S—C4S—H4SA  | 110.5       |
| C10—C9—H9   | 120.7       | C3S—C4S—H4SA  | 110.5       |
| C11—C10—C9  | 118.52 (14) | O1S—C4S—H4SB  | 110.5       |
| C11—C10—H10 | 120.7       | C3S—C4S—H4SB  | 110.5       |
| C9—C10—H10  | 120.7       | H4SA—C4S—H4SB | 108.7       |
| C10—C11—C12 | 119.25 (15) | O3—C24—O4     | 122.80 (16) |
| C10—C11—H11 | 120.4       | O3—C24—C25    | 119.46 (16) |
| C12—C11—H11 | 120.4       | O4—C24—C25    | 117.74 (14) |

|               |             |               |             |
|---------------|-------------|---------------|-------------|
| N2—C12—C11    | 122.37 (14) | C24—C25—H25A  | 109.5       |
| N2—C12—C13    | 116.82 (13) | C24—C25—H25B  | 109.5       |
| C11—C12—C13   | 120.73 (14) | H25A—C25—H25B | 109.5       |
| N5—C13—C12    | 112.03 (12) | C24—C25—H25C  | 109.5       |
| N5—C13—H13A   | 109.2       | H25A—C25—H25C | 109.5       |
| C12—C13—H13A  | 109.2       | H25B—C25—H25C | 109.5       |
| N5—C13—H13B   | 109.2       | C26—O5—H5     | 109.5       |
| C12—C13—H13B  | 109.2       | O6—C26—O5     | 124.62 (15) |
| H13A—C13—H13B | 107.9       | O6—C26—C27    | 121.26 (15) |
| N5—C14—C1     | 112.07 (12) | O5—C26—C27    | 114.07 (14) |
| N5—C14—H14A   | 109.2       | C26—C27—H27A  | 109.5       |
| C1—C14—H14A   | 109.2       | C26—C27—H27B  | 109.5       |
| N5—C14—H14B   | 109.2       | H27A—C27—H27B | 109.5       |
| C1—C14—H14B   | 109.2       | C26—C27—H27C  | 109.5       |
| H14A—C14—H14B | 107.9       | H27A—C27—H27C | 109.5       |
| C16—C15—N4    | 110.18 (11) | H27B—C27—H27C | 109.5       |
| C16—C15—H15A  | 109.6       |               |             |

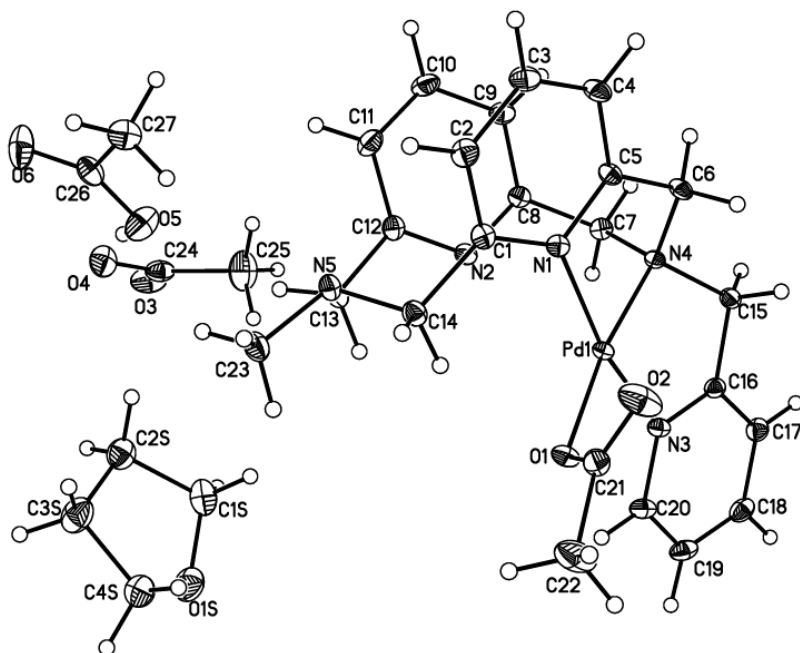

**Figure S19.** Projection view of of  $[(\text{PicCH}_3\text{N}_4)\text{Pd}^{\text{II}}\text{OAc}]_2\text{OAc}$  (**2**) with 50% probability thermal ellipsoids.

## 7. Computational Details

All density functional theory (DFT) calculations were carried out employing the Jaguar 9.1 quantum chemistry program.<sup>2</sup> Electronic exchange and correlation energy contribution to the total electronic energy was approximated with B3LYP hybrid functional<sup>3-4</sup> along with Grimme's D3 dispersion correction (B3LYP-D3).<sup>5</sup> All intermediate and transition state geometries were optimized with 6-31G\*\* basis set for main group atoms.<sup>5-7</sup> Pd were described by Los Alamos relativistic effective core potentials (ECP) and its corresponding LACVP basis set.<sup>8-10</sup> While these basis sets are adequate for obtaining accurate geometries, more reliable energies and EPR parameters were obtained from single point calculations using Dunning's correlation-consistent triple- $\zeta$  basis set, cc-pVTZ(-f)<sup>11</sup> for main group and larger LACV3P\*\* for Pd.<sup>12</sup> The zero-point energy (ZPE), entropic and solvation contributions to the Gibbs energy are obtained from the same level of theory as the geometry optimizations (B3LYP-D3/6-31G\*\*/LACVP) at 298 K. The solvation calculations utilized self-consistent reaction field (SCRF) approach on the gas phase geometry to model the solvation shell of dielectric constant  $\epsilon = 37.5$ .<sup>13</sup>

The free energy in the solution phase  $G(\text{sol})$  reported in these studies were calculated as follows:

$$G(\text{sol}) = G(\text{gas}) + G(\text{solv})$$

$$G(\text{gas}) = H(\text{gas}) - TS(\text{gas})$$

$$H(\text{gas}) = H(\text{SCF}) + \text{ZPE}$$

$G(\text{gas})$  = free energy in gas phase;  $G(\text{solv})$  = free energy of solvation as computed using the continuum solvation model (the entropy of the solvent is implicitly included in this model);  $H(\text{gas})$  = enthalpy in gas phase;  $S(\text{gas})$  = entropy in gas phase;  $H(\text{SCF})$  = Self-consistent field energy, i.e. electronic energy as computed from the SCF procedure; ZPE = zero point energy

### Concerted Metalation Deprotonation (CMD)

The alternative C–H activation process through CMD is examined using computation as shown in Figure S21. The calculation results reveal that the CMD requires 37.1 kcal/mol energy which is insurmountable barrier in the reaction condition.

## Computed energy components for DFT-optimized structures

|                       | E(SCF)/(eV)        | ZPE/(kcal/mol) | S(gas)/(cal/mol) | G(soln)/(kcal/mol) |
|-----------------------|--------------------|----------------|------------------|--------------------|
|                       | cc-pVTZ(-f)/LACV3P | 6-31G**/LACVP  | 6-31G**/LACVP    | 6-31G**/LACVP      |
| Acetonitrile          | -3613.765          | 28.48          | 57.933           | -8.12              |
| Acetate               | -6220.609          | 30.19          | 68.821           | -74.42             |
| Acetic_acid           | -6236.253          | 38.91          | 68.415           | -8.65              |
| PicCH <sub>3</sub> N4 | -29611.291         | 258.038        | 154.782          | -14.29             |
| Protonated_li<br>gand | -29622.475         | 267.545        | 155.647          | -50.12             |
| <b>2</b>              | -39277.109         | 293.46         | 179.961          | -51.93             |
| <b>A1</b>             | -36663.151         | 291.3          | 177.269          | -136.22            |
| <b>A2</b>             | -33048.153         | 261.71         | 148.704          | -145.28            |
| <b>A3</b>             | -33047.718         | 260.49         | 149.913          | -145.39            |
| <b>A3-TS'</b>         | -33047.296         | 259.03         | 148.733          | -143.17            |
| <b>A3-TS</b>          | -33047.474         | 259.35         | 148.824          | -146.18            |
| <b>A4</b>             | -33047.651         | 259.96         | 151.343          | -147.15            |
| <b>A4-TS</b>          | -33047.414         | 259.4          | 148.312          | -144.86            |
| <b>A5</b>             | -33047.883         | 260.36         | 147.31           | -142.48            |
| <b>A5-TS</b>          | -62660.918         | 519.121        | 248.162          | -121.41            |
| <b>A6</b>             | -39276.208         | 291.67         | 182.838          | -49.73             |
| <b>A6-TS</b>          | -39276.211         | 291.38         | 178.049          | -48.98             |
| <b>A7</b>             | -39276.864         | 293.17         | 186.392          | -45.60             |
| <b>1</b>              | -33040.394         | 253.37         | 148.982          | -42.53             |
| <b>2-TS</b>           | -39275.593         | 289.8          | 175.591          | -47.45             |

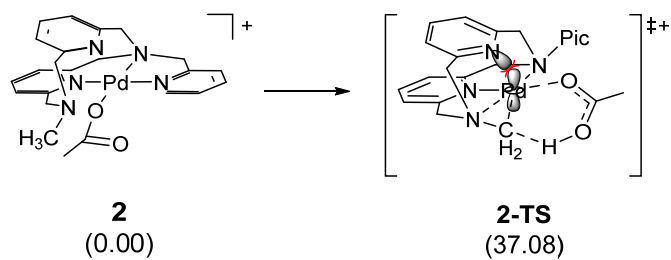

**Figure S20.** A calculated concerted metalation deprotonation (CMD) process in which the Pd-bound acetate promotes C(sp<sup>3</sup>)-H bond activation.

## Cartesian Coordinates of the Optimized Geometries

|              |              |              |              |              |              |              |              |
|--------------|--------------|--------------|--------------|--------------|--------------|--------------|--------------|
| =====        | H            | -1.374032021 | 2.842638493  | -0.868989706 |              |              |              |
| Acetonitrile |              |              |              |              |              |              |              |
| =====        |              |              |              | =====        |              |              |              |
| C            | 5.192547321  | -1.964493513 | -1.168555737 | PicCH3N4     |              |              |              |
| N            | 5.192404270  | -1.964488864 | -2.328603983 |              |              |              |              |
| C            | 5.192533493  | -1.964498043 | 0.292607397  | =====        |              |              |              |
| H            | 6.218322277  | -1.964491606 | 0.672552407  | N            | -1.047486186 | 0.517344534  | -4.663683891 |
| H            | 4.679591656  | -2.852859020 | 0.672375560  | N            | 1.692094326  | 0.505089521  | -2.408634901 |
| H            | 4.679596424  | -1.076132774 | 0.672359109  | N            | -4.142249107 | -0.445642620 | -4.113167286 |
|              |              |              |              | C            | 0.182006344  | 0.085517049  | -4.352771759 |
| =====        |              |              |              | C            | -1.923623085 | -0.361342013 | -5.165124416 |
| Acetate      |              |              |              | C            | 0.793186367  | 0.567080677  | -1.237172127 |
| =====        |              |              |              | C            | 1.092832685  | 1.066067219  | -3.634379387 |
| O            | -2.456018686 | 1.513437748  | -2.469693422 | C            | -3.367320538 | 0.091637798  | -5.245789528 |
| O            | -2.186069250 | 3.280153990  | -1.057450175 | C            | -3.769048691 | 0.147207782  | -2.810504198 |
| C            | -2.767987967 | 2.616344690  | -1.952748060 | C            | -5.590637684 | -0.390928835 | -4.337996960 |
| C            | -4.058975220 | 3.291466713  | -2.551501036 | C            | -2.579147577 | -0.534166813 | -2.154435873 |
| H            | -3.779957771 | 3.921880722  | -3.409461498 | C            | -0.417586654 | -0.332237303 | -1.379125476 |
| H            | -4.769812107 | 2.540175200  | -2.919814110 | C            | -2.580770016 | -1.914235353 | -1.924727201 |
| H            | -4.549242973 | 3.942715883  | -1.816123486 | H            | -3.453664541 | -2.501300335 | -2.188498974 |
|              |              |              |              | C            | -1.442038655 | -2.502083540 | -1.381090522 |
| =====        |              |              |              | C            | -0.328755468 | -1.703565359 | -1.124908209 |
| Acetic_acid  |              |              |              | H            | 0.599961996  | -2.130291939 | -0.758512020 |
| =====        |              |              |              | H            | 1.379782438  | 0.248029321  | -0.368008643 |
| O            | -2.573490620 | 1.402518630  | -2.169728756 | H            | 0.442050755  | 1.596695900  | -1.049790621 |
| O            | -2.093296528 | 3.391219139  | -1.224385619 | H            | 1.918455958  | 1.329322577  | -4.307110786 |
| C            | -2.838555336 | 2.572801113  | -2.010340214 | C            | 0.612227976  | -1.217633247 | -4.618947983 |
| C            | -3.996449947 | 3.315481186  | -2.629037857 | H            | 1.610914946  | -1.520776868 | -4.323340893 |
| H            | -3.622177362 | 4.149710178  | -3.229981422 | C            | -0.279965162 | -2.109044790 | -5.209833622 |
| H            | -4.574927330 | 2.633948565  | -3.251428127 | C            | -1.579992890 | -1.682345271 | -5.468783855 |
| H            | -4.628551960 | 3.738858461  | -1.842954993 | H            | -2.330457687 | -2.362200737 | -5.860486984 |
|              |              |              |              | H            | -3.824382782 | -0.293235540 | -6.164420605 |

H -3.538858891 1.218590617 -2.898344040  
H -4.635203362 0.050468702 -2.146635056  
H -3.390565157 1.192903519 -5.285501480  
H -6.030607700 0.605806649 -4.172827244  
H -5.775536537 -0.658430636 -5.385624409  
C -6.309852123 -1.388675809 -3.449990749  
C -5.930818081 -2.739451647 -3.472192287  
C -6.589341164 -3.638510466 -2.640766382  
C -7.907947063 -1.801245093 -1.855903983  
C -7.604772091 -3.160128593 -1.809072375  
H -5.117945194 -3.050046206 -4.120427132  
H -6.317285061 -4.690637589 -2.635400772  
H -8.687174797 -1.390470266 -1.216083288  
H -8.143264771 -3.821393013 -1.137303710  
N -7.280457497 -0.922992289 -2.652894735  
H 0.022888027 -3.129117727 -5.431004047  
H -1.411975265 -3.570656776 -1.184766769  
N -1.535336971 0.244002208 -1.842171669  
C 2.964792013 1.150106549 -2.097171783  
H 3.421338320 0.664420128 -1.228139758  
H 3.652540684 1.038695931 -2.941624641  
H 2.872485876 2.229496002 -1.871580839  
H 0.519529939 1.986099958 -3.442640066

=====  
Protonated\_ligand  
=====

N -0.936240315 0.506787539 -4.798796654  
N 0.715972662 1.293849707 -2.501402855  
N -4.117844105 -0.268848121 -4.155380726  
C 0.291620284 0.010754540 -4.570031166  
C -1.897929072 -0.332349211 -5.189271927

C 0.842759728 0.124881372 -1.548700333  
C 1.223100781 0.995287955 -3.907760859  
C -3.312948227 0.210507482 -5.283225060  
C -3.781062126 0.376524538 -2.874244690  
C -5.568435669 -0.339900732 -4.409223080  
C -2.724512100 -0.414094597 -2.129344940  
C -0.506584227 -0.581630349 -1.487331986  
C -2.976212025 -1.713338494 -1.669738650  
H -3.963651419 -2.142646313 -1.799273491  
C -1.942592263 -2.436852694 -1.082532883  
C -0.663922787 -1.874618053 -1.005379915  
H 0.176470205 -2.433676720 -0.605896473  
H 1.632999182 -0.543034911 -1.897954345  
H 1.137342334 0.515706360 -0.571018100  
H 2.251602173 0.637399673 -3.821545362  
C 0.639263093 -1.317659497 -4.787246227  
H 1.648069620 -1.671285033 -4.596920967  
C -0.360136360 -2.189048529 -5.237451077  
C -1.645978212 -1.696760535 -5.413398743  
H -2.461536407 -2.349571705 -5.705807209  
H -3.771876097 -0.155995175 -6.206989288  
H -3.419677496 1.404553294 -3.017817259  
H -4.685843945 0.419173598 -2.261379242  
H -3.263193130 1.309601426 -5.344395161  
H -6.070229053 0.631126821 -4.279208660  
H -5.710131645 -0.653110206 -5.447669506  
C -6.208218575 -1.358107567 -3.485939264  
C -6.271816730 -2.710572004 -3.841511726  
C -6.809690952 -3.623032093 -2.936301947  
C -7.147753239 -1.790502667 -1.431619763  
C -7.258246899 -3.154942274 -1.700587153  
H -5.909031868 -3.035218239 -4.812143803



H -6.880478859 -4.676906109 -3.189500570  
H -7.486883640 -1.387349367 -0.479641914  
H -7.687392235 -3.826493263 -0.964096010  
N -6.636663437 -0.903985560 -2.297183037  
H -0.135286242 -3.235272646 -5.420365334  
H -2.116501808 -3.443294525 -0.714280725  
N -1.513311625 0.139955714 -1.987441659  
C 1.283256292 2.559168339 -1.950315952  
H 0.810088038 2.769197941 -0.990041256  
H 2.361493587 2.447880030 -1.819730043  
H 1.074486494 3.373065948 -2.645514727  
H 1.211498737 1.947297096 -4.442050457  
H -0.340383381 1.368784666 -2.580522299

=====  
**2**  
=====

N -1.077981710 0.109207325 -4.720199585  
Pd -2.219172478 1.261408687 -3.413755894  
N 0.701664984 0.534888089 -2.388068199  
N -3.693683863 -0.206020370 -3.813885212  
C 0.263440639 -0.011747099 -4.770107746  
C -1.869542480 -0.708310187 -5.452190876  
C 0.922103405 -0.827017486 -1.907551289  
C 1.095316648 0.771630526 -3.775975466  
C -3.366711855 -0.597226560 -5.226763725  
C -3.753393650 -1.375292659 -2.864780188  
C -4.967514038 0.583524644 -3.710508585  
C -2.426243544 -2.087359905 -2.744362116  
C -0.181708708 -1.793176293 -2.316736937  
C -2.242643356 -3.402489185 -3.169881344  
H -3.077676773 -3.994293690 -3.532535791

C -0.947726846 -3.925368309 -3.132915974  
C 0.100432552 -3.103060961 -2.728631258  
H 1.125825882 -3.459932327 -2.746477842  
H 1.899613380 -1.239628911 -2.219006300  
H 0.939343750 -0.792968750 -0.812531829  
H 2.160711288 0.539433837 -3.961646318  
C 0.852271795 -0.880013704 -5.691491604  
H 1.933533907 -0.952450991 -5.732963562  
C 0.051225618 -1.663943887 -6.515949249  
C -1.333595634 -1.604443789 -6.369689465  
H -1.988382101 -2.250365257 -6.944758415  
H -3.864599943 -1.536623120 -5.497065067  
H -4.045438290 -0.964932442 -1.894080520  
H -4.540734291 -2.059502363 -3.207723379  
H -3.756448984 0.189221919 -5.880491734  
H -5.064692974 1.179244757 -4.623327255  
H -5.839221001 -0.078773454 -3.645281792  
C -4.912018776 1.543273211 -2.541718721  
C -6.019462109 1.913020968 -1.789858460  
C -5.870132446 2.893092632 -0.804633617  
C -3.543858051 3.047997952 -1.371863365  
C -4.620091438 3.473401308 -0.597433507  
H -6.982291698 1.449426293 -1.977374434  
H -6.723922729 3.198609352 -0.208157644  
H -2.539115191 3.445948839 -1.277010560  
H -4.471639633 4.238953114 0.155752212  
N -3.700627804 2.105564594 -2.311677456  
H 0.498828799 -2.345084429 -7.232889175  
H -0.756699860 -4.946124554 -3.450239658  
N -1.431491852 -1.326435328 -2.278117895  
C 1.269636035 1.551810861 -1.503863215  
H 0.897361934 1.394524813 -0.487571388

H 2.373758793 1.538532138 -1.473381877  
H 0.930311143 2.533595562 -1.839712262  
H 0.943641603 1.836596847 -3.972215414  
O -1.029079556 2.899168015 -3.201198816  
C -1.320369601 3.797998667 -4.127612591  
O -2.176368952 3.649260998 -4.994538307  
C -0.484708369 5.061771393 -4.004898548  
H -0.764780998 5.600163937 -3.093513966  
H 0.577503264 4.814707756 -3.923338175  
H -0.657278597 5.702313423 -4.870041370

=====

**A1**

=====

N -1.372096419 -1.198493958 -4.418968201  
Pd -2.058930159 0.291588098 -3.153453112  
N 0.072063066 0.589668334 -2.876986742  
N -3.596498251 -2.157777786 -2.829760790  
C -0.077289566 -1.009353399 -4.782787800  
C -2.002515316 -2.352634430 -4.736511230  
C 0.715454578 -0.230757281 -1.780819535  
C 0.579679132 0.231685117 -4.247869492  
C -3.385972738 -2.660902262 -4.180044651  
C -3.135205269 -3.039681673 -1.753343701  
C -4.872484207 -1.502652407 -2.605239630  
C -1.618655205 -3.019219160 -1.677825809  
C 0.245482892 -1.664543867 -1.731370211  
C -0.832841098 -4.173347473 -1.732960582  
H -1.297587633 -5.154360294 -1.755372286  
C 0.555482566 -4.036577225 -1.780910730  
C 1.111610532 -2.755969524 -1.808308244  
H 2.184457302 -2.613248587 -1.891775608

H 1.803915620 -0.167523056 -1.899350643  
H 0.447084665 0.260351002 -0.842087686  
H 1.670811415 0.122502051 -4.229964256  
C 0.591632187 -1.911608219 -5.598101139  
H 1.623685598 -1.728131175 -5.876619339  
C -0.081562713 -3.054525852 -6.027048588  
C -1.372686267 -3.283225775 -5.566159725  
H -1.897100091 -4.197894096 -5.822636127  
H -3.535792112 -3.749310970 -4.244026661  
H -3.538232803 -2.659706354 -0.809038222  
H -3.501289368 -4.071666241 -1.872323275  
H -4.124562740 -2.219776630 -4.858052731  
H -5.741533279 -2.178941965 -2.662669659  
H -4.862589836 -1.086804152 -1.589965105  
C -5.077460289 -0.376971632 -3.597538710  
C -6.330752373 -0.153540358 -4.170693398  
C -6.500747204 0.858945370 -5.111404419  
C -4.176099300 1.366914630 -4.871669292  
C -5.397794724 1.631667972 -5.474436760  
H -7.161716938 -0.789083481 -3.882298708  
H -7.472121239 1.030678391 -5.564672470  
H -3.292433739 1.942106485 -5.122774124  
H -5.472533226 2.420549393 -6.214685917  
N -4.018923759 0.386185825 -3.954810858  
H 0.410177648 -3.775703430 -6.672453880  
H 1.193635821 -4.913902283 -1.825461149  
N -1.078189611 -1.797524333 -1.627431393  
C 0.395371526 2.024518490 -2.621573925  
H 0.029762521 2.305591106 -1.635089517  
H 1.480520010 2.178397417 -2.659698486  
H -0.083713643 2.650915623 -3.375094652  
H 0.348662615 1.074194551 -4.908897877

C -2.996676207 2.572139263 -1.071900964  
N -2.629022121 1.794571757 -1.846042752  
C -3.451650143 3.547163725 -0.092428215  
H -3.298910618 3.152673721 0.917032480  
H -4.516258717 3.751091003 -0.242444515  
H -2.888269424 4.478524685 -0.205933124

---

**A2**

---

N -1.132691860 0.050220773 -4.438726425  
Pd -2.201097012 1.319531441 -3.343755484  
N -0.080918640 1.807250857 -2.613436699  
N -3.745837688 -0.079845652 -3.696860552  
C 0.209469393 0.101851851 -4.438639164  
C -1.836932063 -0.927190125 -5.057215691  
C 0.142305985 1.025561571 -1.318881154  
C 0.803290725 1.289250851 -3.717965126  
C -3.345408916 -0.791924477 -4.964110374  
C -3.843629599 -1.037961483 -2.500064611  
C -4.988401890 0.749774277 -3.800424337  
C -2.474037170 -1.392261386 -1.949276567  
C -0.482983172 -0.355778694 -1.363735199  
C -1.877505302 -2.652321339 -1.970231891  
H -2.435163498 -3.536939383 -2.262387991  
C -0.524938762 -2.739030838 -1.614838123  
C 0.203667015 -1.572620630 -1.356469870  
H 1.273079515 -1.612640262 -1.173495173  
H 1.218962312 0.988884151 -1.114911199  
H -0.339360237 1.603165388 -0.526545644  
H 1.802993298 1.055355668 -3.332387924  
C 0.933621764 -0.862004995 -5.136306763

H 2.017745495 -0.825981498 -5.152775288  
C 0.236871481 -1.868335247 -5.807728291  
C -1.161562562 -1.912368774 -5.764902115  
H -1.711019278 -2.698536873 -6.271870136  
H -3.839488745 -1.767295361 -5.035661697  
H -4.410039902 -0.507246435 -1.731856227  
H -4.416630745 -1.914654851 -2.818843603  
H -3.689052820 -0.185524717 -5.808813095  
H -5.012356281 1.192262411 -4.801395893  
H -5.885637283 0.129927069 -3.688073635  
C -4.958619118 1.861476302 -2.766665936  
C -6.119947433 2.365564585 -2.195182562  
C -6.035574913 3.440844536 -1.307540655  
C -3.657025814 3.416977406 -1.593041539  
C -4.785886288 3.978417873 -1.005410314  
H -7.079600334 1.922807932 -2.441200495  
H -6.934988976 3.845909595 -0.854717016  
H -2.660483360 3.782669544 -1.374425054  
H -4.679416656 4.812608242 -0.321123838  
N -3.739049911 2.387006521 -2.452620745  
H 0.782896638 -2.627712727 -6.358779430  
H -0.029029846 -3.704605579 -1.599878788  
N -1.802051187 -0.309586495 -1.551595569  
C 0.246290237 3.238542318 -2.368217945  
H -0.367932498 3.610597610 -1.546903610  
H 1.301220894 3.364205360 -2.093966722  
H 0.034500781 3.819374323 -3.267216206  
H 0.917665541 2.094550133 -4.452046394

---

**A3**

---

N -1.145040154 0.172655001 -4.485486031  
Pd -2.445680857 1.468777657 -3.430503607  
N 0.592894256 1.735643387 -2.560651779  
N -3.763715267 -0.145512298 -3.598651171  
C 0.197758108 0.169796854 -4.549643040  
C -1.854292154 -0.849246204 -5.042328835  
C 0.673917234 0.881211102 -1.364531040  
C 1.065949798 1.222442746 -3.825562716  
C -3.356911182 -0.841688037 -4.859329700  
C -3.654304981 -1.007975101 -2.355735064  
C -5.130299568 0.472085088 -3.676020145  
C -2.228681326 -1.303655267 -1.925061822  
C -0.161261514 -0.392649174 -1.433047771  
C -1.744027734 -2.606225729 -1.814086199  
H -2.390357018 -3.459393740 -1.995200753  
C -0.402097583 -2.784621716 -1.467539430  
C 0.409679562 -1.663531899 -1.300174832  
H 1.466742754 -1.772484064 -1.078748345  
H 1.726926565 0.619092345 -1.212123156  
H 0.364944547 1.481464505 -0.504162014  
H 2.046449661 0.760001242 -3.673398018  
C 0.868002892 -0.806088150 -5.293781757  
H 1.951297879 -0.778933406 -5.353086472  
C 0.150993824 -1.810096383 -5.933162689  
C -1.233928561 -1.850179553 -5.776603222  
H -1.823730826 -2.650326967 -6.211244106  
H -3.750380754 -1.865053654 -4.873413563  
H -4.163506985 -0.458650231 -1.559320807  
H -4.209605217 -1.934528708 -2.542408228  
H -3.812614441 -0.302503407 -5.696039677  
H -5.281136990 0.825498164 -4.700788021  
H -5.903180599 -0.275205910 -3.462492228

C -5.222383022 1.650727630 -2.735620737  
C -6.403142452 2.027424097 -2.109202623  
C -6.417132854 3.177402258 -1.315808177  
C -4.088300705 3.477636337 -1.801802874  
C -5.243924618 3.914681911 -1.163557649  
H -7.300272465 1.431815147 -2.243119001  
H -7.331789970 3.487858772 -0.820713460  
H -3.148865938 4.009005070 -1.704563856  
H -5.214371681 4.812269211 -0.556064188  
N -4.080289841 2.374352694 -2.572542906  
H 0.663622499 -2.571258307 -6.512983322  
H 0.009440463 -3.783617496 -1.361182451  
N -1.464439034 -0.228101358 -1.688841701  
C -0.203791991 2.876783371 -2.592684507  
H -0.442864150 3.258786678 -1.600475669  
H 0.194185659 3.663196087 -3.240729809  
H 1.221379399 2.064415693 -4.510815620  
H -1.276996017 2.738027096 -3.112826586

=====  
**A3-TS'**  
=====

N -0.581815600 -0.634359837 -3.684191704  
Pd -1.772421122 1.100165129 -3.785248280  
N 0.648811996 1.682030797 -2.454795837  
N -3.429806948 -0.404246360 -3.663828611  
C 0.677135289 -0.723199010 -3.229308844  
C -1.332917452 -1.755099535 -3.875051737  
C 0.124102756 1.764242768 -1.079192519  
C 1.461873293 0.541398346 -2.845197201  
C -2.774066687 -1.575913668 -4.316247940  
C -3.895512342 -0.676480651 -2.271808624

C -4.478804111 0.252950788 -4.496798515  
C -2.811556816 -0.481047899 -1.220112681  
C -0.886342049 0.696875870 -0.656782150  
C -2.753232002 -1.233693600 -0.046096936  
H -3.488197565 -2.005531073 0.158318624  
C -1.716438770 -0.975885332 0.850980937  
C -0.754848957 -0.011388449 0.537450850  
H 0.076962143 0.180776224 1.207839012  
H 0.985244811 1.736550689 -0.404602796  
H -0.331381708 2.753887892 -0.969397545  
H 2.133412123 0.284071922 -2.021648884  
C 1.286466837 -1.968542337 -3.060691595  
H 2.313696861 -2.021293879 -2.713855505  
C 0.559667468 -3.125602961 -3.316438913  
C -0.778066397 -3.016018867 -3.700591803  
H -1.385571599 -3.900288582 -3.859513998  
H -3.337000608 -2.498867750 -4.131740570  
H -4.709061623 0.024898183 -2.059260845  
H -4.317875862 -1.686157942 -2.205286741  
H -2.780321121 -1.401411891 -5.397213459  
H -4.207440853 0.113986902 -5.548149109  
H -5.461070061 -0.211543590 -4.351575851  
C -4.546185017 1.741922021 -4.227010250  
C -5.743865967 2.446663618 -4.256562710  
C -5.737308025 3.832366467 -4.087546349  
C -3.359068394 3.725567341 -3.842984915  
C -4.523979187 4.483255863 -3.876853943  
H -6.674106121 1.912695527 -4.417718410  
H -6.666615963 4.391914845 -4.115841866  
H -2.394256353 4.190500259 -3.676915169  
H -4.469860554 5.557409286 -3.739087105  
N -3.366856337 2.392155886 -4.015539169

H 1.016398549 -4.101559162 -3.185283661  
H -1.642638803 -1.539434910 1.776000977  
N -1.923431039 0.480975986 -1.478234172  
C 0.091340341 2.416829348 -3.469298601  
H -0.389487416 3.340156555 -3.154838085  
H 0.779034674 2.551320314 -4.302704334  
H -0.957501233 1.806375504 -4.884155273  
H 2.094455957 0.835300386 -3.691620588

=====  
**A3-TS**  
=====

N -0.625691533 -0.551009595 -3.548896074  
Pd -1.892873049 1.164931059 -3.901174784  
N 0.782935977 1.688121200 -2.195108414  
N -3.444273233 -0.281767517 -3.508688450  
C 0.655364752 -0.649614096 -3.137933254  
C -1.370585203 -1.684112787 -3.643568754  
C 0.404236555 1.531110883 -0.761716723  
C 1.499136090 0.600772202 -2.884428740  
C -2.846131802 -1.560547829 -3.984673262  
C -3.859761238 -0.301659256 -2.064046860  
C -4.578736305 0.194121137 -4.360030174  
C -2.688921452 -0.405152470 -1.107632041  
C -0.640063763 0.456972778 -0.505593717  
C -2.557267189 -1.466191530 -0.208779782  
H -3.330453634 -2.223927736 -0.130660132  
C -1.407783985 -1.536578774 0.579306126  
C -0.412734061 -0.573725998 0.409849077  
H 0.512566745 -0.624156356 0.975301623  
H 1.328642011 1.312678099 -0.219158217  
H 0.040312394 2.503495932 -0.420618981

H 2.363321543 0.321910262 -2.276927471  
C 1.267504454 -1.886200666 -2.937835217  
H 2.305289030 -1.931160450 -2.624016285  
C 0.535164773 -3.054783583 -3.130599499  
C -0.812501729 -2.946596622 -3.454520226  
H -1.434867382 -3.830148935 -3.549755812  
H -3.390639544 -2.424994946 -3.584137440  
H -4.391133308 0.636738956 -1.880511165  
H -4.564699173 -1.127974629 -1.907365441  
H -2.948280811 -1.592109203 -5.074406147  
H -4.382925034 -0.122117244 -5.389436722  
H -5.526785851 -0.262339979 -4.051495075  
C -4.671734810 1.704626560 -4.341650963  
C -5.885885715 2.373265266 -4.438532352  
C -5.896861553 3.767501593 -4.513635159  
C -3.503329277 3.734328270 -4.372129917  
C -4.686147213 4.456788063 -4.485753536  
H -6.811441422 1.807385683 -4.460987091  
H -6.837133408 4.303957939 -4.591629505  
H -2.538448095 4.223966122 -4.343691826  
H -4.649519444 5.538697720 -4.547124386  
N -3.494423389 2.389045477 -4.299046040  
H 0.996854961 -4.026817322 -2.988994837  
H -1.276927829 -2.343986988 1.292959213  
N -1.767810702 0.562805116 -1.212799430  
C 0.402129978 2.720479250 -2.893616676  
H -0.181741491 3.499850035 -2.416331768  
H 0.883620024 2.927821636 -3.840616226  
H -0.834191978 2.223174572 -4.332961082  
H 1.873765588 0.995589554 -3.833424091

**A4**

=====  
N -0.649399698 -0.435971767 -3.591384411  
Pd -1.900878668 1.170215845 -4.078388214  
N 0.750377536 1.630089283 -1.925054550  
N -3.444638252 -0.197954208 -3.366514683  
C 0.662317216 -0.442472994 -3.266541719  
C -1.360652447 -1.586866975 -3.511579752  
C 0.748324513 0.973068237 -0.593333006  
C 1.349756837 0.895757258 -3.085773706  
C -2.865998030 -1.523899436 -3.736785173  
C -3.812808752 -0.076256953 -1.916274786  
C -4.606577396 0.211600110 -4.218436241  
C -2.664456129 -0.373789102 -0.975818574  
C -0.496684641 0.108244188 -0.376270354  
C -2.705364704 -1.463934064 -0.105028279  
H -3.593725920 -2.083949566 -0.038876295  
C -1.579307675 -1.749662876 0.670386493  
C -0.436271518 -0.969875515 0.512782454  
H 0.473196477 -1.193218827 1.062454104  
H 1.651421905 0.363259941 -0.521394432  
H 0.819910288 1.759334087 0.164183736  
H 2.411696911 0.759488344 -2.869580746  
C 1.341385245 -1.627409339 -2.999923944  
H 2.400824547 -1.606615663 -2.766405344  
C 0.638082266 -2.833396912 -3.017529964  
C -0.735077620 -2.803623676 -3.234197617  
H -1.325418234 -3.712705374 -3.184189081  
H -3.351053715 -2.342576742 -3.190253735  
H -4.160861969 0.950384676 -1.768250227  
H -4.650506020 -0.753859878 -1.705860496  
H -3.059678555 -1.690860987 -4.801315308

H -4.464286327 -0.221970022 -5.213683128  
H -5.551422119 -0.182275727 -3.824653864  
C -4.679764271 1.718721151 -4.376409531  
C -5.890965939 2.391678810 -4.480807781  
C -5.892283916 3.763457537 -4.743382454  
C -3.495225430 3.704514742 -4.761699677  
C -4.676301003 4.427364349 -4.892632484  
H -6.822137833 1.846445203 -4.366981506  
H -6.830365658 4.302238941 -4.831770420  
H -2.524158716 4.170630932 -4.869740486  
H -4.634003162 5.489566326 -5.106301785  
N -3.496586084 2.381953716 -4.505276680  
H 1.146846414 -3.772033930 -2.821722507  
H -1.583116770 -2.586165428 1.362377644  
N -1.589071631 0.426746428 -1.064407706  
C 0.111603998 2.732140541 -2.095754147  
H -0.368897945 3.207453012 -1.246484280  
H 0.077671647 3.194821835 -3.074789286  
H -0.849598110 2.090114594 -4.746243954  
H 1.239841104 1.525845766 -3.970055580

=====  
**A4-TS**  
=====

N -0.604912937 -0.538059354 -3.637155533  
Pd -1.816865325 1.161766887 -3.919798136  
N 0.658152044 1.676957369 -2.231128931  
N -3.475923777 -0.325858384 -3.479498625  
C 0.684712350 -0.589925349 -3.251769066  
C -1.350195408 -1.673323035 -3.668095112  
C 0.402987033 1.390362620 -0.803903878  
C 1.442463756 0.719467282 -3.031195164

C -2.839125156 -1.574536562 -3.984148026  
C -3.929954052 -0.395416737 -2.065625906  
C -4.549528599 0.216947943 -4.358668327  
C -2.771312475 -0.467719555 -1.093739033  
C -0.699753821 0.370589733 -0.529611707  
C -2.716791868 -1.419141173 -0.074792340  
H -3.529312134 -2.125070810 0.064374268  
C -1.592527390 -1.449023724 0.751011431  
C -0.551979303 -0.553703547 0.507795334  
H 0.350972235 -0.572743177 1.110164285  
H 1.346505046 1.050070643 -0.369866192  
H 0.154438391 2.341890574 -0.324346989  
H 2.382761955 0.513370156 -2.515741587  
C 1.320461988 -1.804754138 -3.011753321  
H 2.364732981 -1.821557999 -2.717918396  
C 0.593064547 -2.988293409 -3.130987644  
C -0.764621675 -2.915662766 -3.428010464  
H -1.374136090 -3.812593460 -3.461221933  
H -3.348287344 -2.466035843 -3.596145630  
H -4.500731945 0.518660724 -1.869613171  
H -4.608353138 -1.247716188 -1.924690723  
H -2.952045918 -1.593958855 -5.073249340  
H -4.327770233 -0.075709671 -5.390036583  
H -5.530251026 -0.205822691 -4.108035564  
C -4.601826191 1.733160853 -4.309126377  
C -5.803919792 2.427096844 -4.390382767  
C -5.794465542 3.822175741 -4.446554661  
C -3.403220415 3.750258207 -4.319970608  
C -4.573781490 4.493756294 -4.416642666  
H -6.738950729 1.877155781 -4.416887760  
H -6.727169037 4.373274803 -4.513595104  
H -2.430187941 4.225541592 -4.295515537

H -4.520440102 5.575608253 -4.465833187  
N -3.415766716 2.404461145 -4.261687279  
H 1.068114281 -3.947387218 -2.950284958  
H -1.517241955 -2.175080776 1.554518223  
N -1.796047568 0.432679236 -1.288195848  
C -0.008254875 2.622370720 -2.859719753  
H -0.658328295 3.268684864 -2.279031992  
H 0.363352329 2.976554394 -3.810535908  
H -0.978369772 1.833123207 -5.003855228  
H 1.677889943 1.190697908 -3.989800453

=====

**A5**

=====

N -0.578164458 -0.656663537 -3.692109108  
Pd -1.749532580 1.087239981 -3.721443892  
N 0.668751895 1.676666737 -2.475907087  
N -3.448425531 -0.439678520 -3.725341797  
C 0.689706147 -0.732148588 -3.263189793  
C -1.324525237 -1.774651170 -3.893116236  
C 0.242476597 1.710001826 -1.073624253  
C 1.468815088 0.555470765 -2.945559263  
C -2.783642530 -1.622942686 -4.317958355  
C -3.913949013 -0.605084121 -2.324573040  
C -4.449772358 0.240564361 -4.579159737  
C -2.826267004 -0.395175815 -1.282389164  
C -0.861194789 0.720723689 -0.688291252  
C -2.831378937 -1.101740003 -0.081566676  
H -3.607316732 -1.833703399 0.117354110  
C -1.820143104 -0.860088229 0.847718596  
C -0.811423779 0.049688131 0.533186853  
H 0.009615860 0.228491783 1.220031857

H 1.117996693 1.526672244 -0.445238650  
H -0.094419882 2.729496241 -0.855119526  
H 2.226849318 0.321733415 -2.193801403  
C 1.312509179 -1.971231818 -3.108942986  
H 2.344287872 -2.018553972 -2.775654554  
C 0.590108573 -3.132775784 -3.367457628  
C -0.751211762 -3.032368422 -3.740157604  
H -1.352025867 -3.921365738 -3.900990486  
H -3.323059797 -2.549818993 -4.084825993  
H -4.692140102 0.145071104 -2.145919561  
H -4.382917404 -1.587009192 -2.183056355  
H -2.803661823 -1.505666971 -5.406946659  
H -4.133614540 0.134879351 -5.622410774  
H -5.445219040 -0.212899446 -4.493329525  
C -4.529111862 1.726878166 -4.258312702  
C -5.730308056 2.423594952 -4.342665672  
C -5.750763893 3.801126719 -4.117675304  
C -3.393154621 3.704727888 -3.716820717  
C -4.560926437 4.453433990 -3.801593781  
H -6.641749382 1.888501406 -4.588586807  
H -6.682501793 4.353714466 -4.185803890  
H -2.446205854 4.170612335 -3.471319675  
H -4.528275490 5.521886349 -3.619495392  
N -3.379033327 2.378410339 -3.934735537  
H 1.055205584 -4.106438637 -3.248473883  
H -1.802222013 -1.395400047 1.792012215  
N -1.875749469 0.524488986 -1.549752355  
C -0.059623949 2.371621847 -3.407206297  
H -0.508183599 3.289637566 -3.030151367  
H 0.422750324 2.476190805 -4.376246929  
H -1.573300362 1.279141665 -5.224563599  
H 2.003250360 0.870043397 -3.849623442



=====  
**A5-TS**  
=====

N -1.381760359 -0.409820586 -5.316318512  
Pd -0.283158481 1.256193399 -5.954968452  
N 0.443329334 0.653233409 -3.318601370  
N -2.204581499 1.637818694 -7.162618160  
C -1.150334835 -1.119873047 -4.203523159  
C -2.482983112 -0.623784900 -6.082745552  
C -0.317826927 1.631353259 -2.536525726  
C 0.026405592 -0.737421572 -3.284878969  
C -2.784496784 0.281174958 -7.271446228  
C -3.052201271 2.612497807 -6.434384346  
C -1.700084686 2.224665642 -8.421893120  
C -3.028314829 2.423226357 -4.933197975  
C -1.707573891 1.965719700 -3.076969862  
C -4.180785656 2.490956783 -4.152025700  
H -5.144528866 2.676780224 -4.614900112  
C -4.067160606 2.302634001 -2.774990320  
C -2.814894915 2.022295475 -2.229673862  
H -2.698933601 1.839225054 -1.166283011  
H -0.409511596 1.255355477 -1.513661742  
H 0.279757529 2.547928333 -2.486658573  
H -0.250736654 -0.999147117 -2.260103703  
C -1.971226692 -2.192317486 -3.863497257  
H -1.768749237 -2.766729355 -2.965131760  
C -3.058932066 -2.496513367 -4.680274487  
C -3.332229614 -1.687876105 -5.780629635  
H -4.207403660 -1.864181757 -6.397389412  
H -3.874860048 0.328649998 -7.396010399  
H -2.658098698 3.611410618 -6.652224541

H -4.082727432 2.580679178 -6.813453674  
H -2.396887064 -0.177432597 -8.195818901  
H -1.457119584 1.437011003 -9.140320778  
H -2.474474430 2.807791948 -8.930329323  
C -0.474823296 3.089215517 -8.197108269  
C -0.171156093 4.112343311 -9.096486092  
C 1.006255269 4.839838982 -8.951615334  
C 1.521616340 3.509599209 -7.031699181  
C 1.871179342 4.533686161 -7.899198055  
H -0.850717962 4.300456524 -9.919769287  
H 1.250499964 5.631829262 -9.652643204  
H 2.162403584 3.224393129 -6.205139637  
H 2.800863504 5.072006226 -7.751976967  
N 0.375933915 2.813328028 -7.172035694  
H -3.710409164 -3.330402613 -4.437451839  
H -4.945955753 2.348381281 -2.139230490  
N -1.818663478 2.197242498 -4.393031120  
C 1.163857818 1.081555009 -4.416148663  
H 1.545718431 2.097317696 -4.311842918  
H 1.900142550 0.370734841 -4.782773972  
H 0.728005230 0.361503869 -6.707408905  
H 0.889977038 -1.359584570 -3.543696165  
N -1.883007765 -0.768999636 -10.121249199  
C -2.876831293 -1.082082272 -10.962788582  
C -0.674505711 -1.310226679 -10.300434113  
C -3.437079430 1.929998040 -11.713695526  
N -3.918591022 1.155285954 -10.549649239  
C -4.155336380 -0.271162868 -10.825444221  
C -5.132652760 1.777654648 -10.020874977  
C 0.410579175 -0.782653868 -9.390925407  
N 1.546209097 -0.120675400 -10.056910515  
C 1.259573579 1.157145858 -10.758231163

C 2.596824646 0.203391492 -9.063890457  
C -2.726452112 -2.067323685 -11.939614296  
C -0.431931555 -2.297479391 -11.258021355  
C -2.074340105 1.516886830 -12.245249748  
H -4.169008255 1.898076892 -12.540850639  
H -3.374554634 2.976520061 -11.390486717  
H -4.783859253 -0.424305528 -11.721279144  
H -4.731195450 -0.671564519 -9.980381012  
H 0.821282923 -1.636767507 -8.848526955  
H -0.062620766 -0.133462757 -8.637055397  
C 0.159104317 1.136341214 -11.796103477  
H 1.008104324 1.946206212 -10.034280777  
H 2.200309515 1.451550007 -11.238687515  
H 3.496097326 0.502696216 -9.613846779  
H 2.293791533 1.060716271 -8.436206818  
C 2.916203499 -0.942291021 -8.138617516  
C 0.382013291 0.625682533 -13.078567505  
N -1.029863358 1.617635846 -11.406753540  
C -1.933704734 1.031397820 -13.547370911  
H 1.363212943 0.251055866 -13.352178574  
C -0.679668248 0.596264839 -13.976803780  
H -0.542715013 0.217613444 -14.985391617  
H -2.794788837 0.977650523 -14.206133842  
H -3.549388409 -2.310555696 -12.604887009  
C -1.489941001 -2.703293562 -12.067554474  
H -1.346414924 -3.476235867 -12.816963196  
H 0.564562798 -2.711322784 -11.372181892  
C 3.751559973 -1.985591769 -8.545857430  
N 2.305225134 -0.943749070 -6.937346458  
C 3.962493658 -3.065118790 -7.691121578  
H 4.214373112 -1.946208477 -9.526559830  
C 3.322638988 -3.072220802 -6.451651096

H 4.608206749 -3.886631012 -7.986126900  
C 2.506048918 -1.992133737 -6.127220154  
H 1.982889771 -1.972757936 -5.174566746  
H 3.450957537 -3.892429829 -5.753065586  
H -5.981322765 1.772211194 -10.728199959  
H -5.453891754 1.253141880 -9.113572121  
H -4.930283070 2.821797609 -9.756989479

=====  
**A6**  
=====

N -0.362429351 -1.051359057 -3.369601965  
Pd -1.352967739 0.842504501 -3.398435831  
N 1.238269210 1.234509468 -2.436451674  
N -3.187973261 -0.581661224 -3.137609005  
C 0.928246379 -1.218806863 -3.040784359  
C -1.208923817 -2.105449438 -3.404361725  
C 0.957163811 1.371877432 -1.007107377  
C 1.849654317 0.004412189 -2.904471636  
C -2.669777632 -1.845260859 -3.709862232  
C -3.472216368 -0.641431510 -1.677098274  
C -4.327349663 -0.048062466 -3.929962635  
C -2.254379272 -0.484910101 -0.781163216  
C -0.158492848 0.485288262 -0.444110662  
C -2.172837734 -1.162886143 0.436631709  
H -2.973214149 -1.829859853 0.739607751  
C -1.047447085 -0.980159938 1.237209082  
C -0.016084930 -0.157349959 0.785386801  
H 0.890947819 -0.027642809 1.367183328  
H 1.879138470 1.169213533 -0.453355879  
H 0.698406160 2.421173573 -0.826672196  
H 2.669024706 -0.264017016 -2.231170177

C 1.448930264 -2.494640589 -2.822611570  
H 2.497642994 -2.611026525 -2.567883492  
C 0.607789278 -3.600113869 -2.911300659  
C -0.743343294 -3.399890184 -3.184499502  
H -1.439170837 -4.231542110 -3.213173389  
H -3.273508787 -2.702398777 -3.390949249  
H -4.148906231 0.190328866 -1.455164552  
H -4.016314507 -1.556996703 -1.427026391  
H -2.774276972 -1.767499208 -4.798839569  
H -4.672143936 0.854627669 -3.414170980  
H -3.928092480 0.294645458 -4.888791084  
C -5.488785267 -1.000238419 -4.161991596  
C -6.255503178 -0.879774988 -5.326020718  
C -7.337418556 -1.738794684 -5.509839058  
C -6.779777050 -2.748374939 -3.412710190  
C -7.608201981 -2.696051121 -4.532557487  
H -6.004743576 -0.129094258 -6.070062637  
H -7.951152325 -1.668324351 -6.403009892  
H -6.954076290 -3.486549139 -2.632485390  
H -8.435658455 -3.390311003 -4.635540962  
N -5.741858959 -1.922479987 -3.219912291  
H 0.992589772 -4.600269794 -2.736958027  
H -0.961313069 -1.496023297 2.188648939  
N -1.274321795 0.347722501 -1.175983667  
C 0.431895733 1.916274309 -3.344653845  
H 0.096875995 2.893277407 -2.999825001  
H 0.837390423 1.928228140 -4.355337620  
H -1.444298625 1.030329347 -4.904152870  
H 2.297239065 0.201688945 -3.886402369  
O -2.369069815 2.596964836 -3.423980236  
O -2.666703939 2.358866453 -5.655580521  
C -2.832895517 2.967268705 -4.594874859

C -3.628875256 4.259538174 -4.531348228  
H -4.425855637 4.170925617 -3.788019896  
H -2.973603487 5.074122906 -4.209375381  
H -4.047567368 4.486445904 -5.511363983

=====  
**A6-TS**  
=====

N -0.356585383 -1.032710075 -3.358029366  
Pd -1.360114694 0.856838703 -3.394593000  
N 1.217404246 1.255221248 -2.397737741  
N -3.183595896 -0.581152439 -3.145115137  
C 0.933891058 -1.194015503 -3.026796103  
C -1.194747567 -2.092889071 -3.407554388  
C 0.923346221 1.372439742 -0.968013346  
C 1.843548894 0.036471155 -2.874049902  
C -2.656362295 -1.841294169 -3.717237949  
C -3.481165886 -0.643284261 -1.686866522  
C -4.318313599 -0.051407274 -3.943179607  
C -2.261533976 -0.524422705 -0.788975537  
C -0.172666430 0.449387729 -0.427213758  
C -2.156315804 -1.268923163 0.387460321  
H -2.944969893 -1.960661888 0.664196372  
C -1.021007419 -1.118141890 1.181141496  
C -0.004425842 -0.260183305 0.762035668  
H 0.909170628 -0.152913272 1.338121176  
H 1.846758485 1.188425422 -0.409855723  
H 0.634895325 2.412451744 -0.780396521  
H 2.661088467 -0.231074363 -2.197961569  
C 1.464220166 -2.468030453 -2.822504997  
H 2.513276815 -2.578769684 -2.567035198  
C 0.631561041 -3.578653097 -2.924939394

C -0.720200539 -3.385855436 -3.199416876  
H -1.409606576 -4.222261906 -3.238908529  
H -3.256809950 -2.701718807 -3.401697874  
H -4.135025501 0.206899256 -1.466253996  
H -4.048664093 -1.547486782 -1.448774934  
H -2.755749941 -1.762915134 -4.806576729  
H -4.651623726 0.865687490 -3.445370674  
H -3.919838190 0.267595589 -4.910907745  
C -5.492290974 -0.992681563 -4.155541420  
C -6.315660954 -0.820026636 -5.273523331  
C -7.406381607 -1.669787407 -5.441095829  
C -6.749810219 -2.770422459 -3.420020819  
C -7.630819798 -2.670036554 -4.494827747  
H -6.100684643 -0.037157513 -5.995298862  
H -8.063554764 -1.559455037 -6.298529625  
H -6.887040138 -3.541139603 -2.664360523  
H -8.463778496 -3.358917236 -4.587871075  
N -5.701393127 -1.953776360 -3.243597507  
H 1.023300409 -4.577610970 -2.760080576  
H -0.915564001 -1.685422540 2.100874424  
N -1.297233462 0.340715259 -1.149369955  
C 0.411898017 1.940715671 -3.306017876  
H 0.069310732 2.911721468 -2.950561523  
H 0.830405235 1.971687078 -4.311209202  
H -1.442682028 1.058729887 -4.915941715  
H 2.295381069 0.247034103 -3.851171732  
O -2.416539669 2.600757122 -3.471248150  
O -2.560135126 2.288631916 -5.701263428  
C -2.808800697 2.933533669 -4.672701359  
C -3.613955259 4.218675613 -4.719547272  
H -4.339718342 4.245967388 -3.903922558  
H -2.933549643 5.065309048 -4.584057331

H -4.112361431 4.311162472 -5.684070110

=====

**A7**

=====

N -0.786544323 -0.526346624 -3.553239346  
Pd -1.802820206 1.405965805 -3.549349308  
N 0.725156307 1.658142328 -2.343244314  
N -3.614146233 -0.100712769 -3.367957830  
C 0.490766883 -0.721046090 -3.200161695  
C -1.615405440 -1.580793142 -3.714172125  
C 0.382740110 1.626215100 -0.913681507  
C 1.384049177 0.495922744 -2.900117874  
C -3.067795038 -1.297543406 -4.046180725  
C -3.912480116 -0.326621771 -1.917762160  
C -4.809283257 0.430040330 -4.088660717  
C -2.673546553 -0.410556346 -1.047016025  
C -0.625056505 0.543087304 -0.531267524  
C -2.423422098 -1.503069162 -0.212624714  
H -3.140422583 -2.314847708 -0.140552580  
C -1.228067875 -1.535898566 0.505224705  
C -0.299154550 -0.510424674 0.327299595  
H 0.663170815 -0.534898043 0.829560101  
H 1.307712078 1.480676770 -0.345229864  
H -0.018964591 2.609667540 -0.652617276  
H 2.174572468 0.170752198 -2.216117382  
C 1.022875547 -2.007306814 -3.095105648  
H 2.065150976 -2.137962103 -2.821101904  
C 0.197835699 -3.105008841 -3.316439867  
C -1.147945166 -2.887980461 -3.606336117  
H -1.834032536 -3.718783617 -3.733438253  
H -3.668681145 -2.193813324 -3.838286400

H -4.522175789 0.519166946 -1.589760184  
H -4.525483131 -1.226125360 -1.789059877  
H -3.136740685 -1.114802837 -5.125607491  
H -5.111669064 1.346154571 -3.574443579  
H -4.470866203 0.702860773 -5.093624592  
C -5.984096527 -0.524657369 -4.166093349  
C -6.237234592 -1.268708825 -5.323487759  
C -7.306174278 -2.163430214 -5.330330372  
C -7.755074501 -1.494124770 -3.073037863  
C -8.082453728 -2.282251596 -4.179973602  
H -5.614737988 -1.142598152 -6.204617500  
H -7.529368877 -2.750316143 -6.216591835  
H -8.343416214 -1.556156635 -2.159506798  
H -8.925425529 -2.964147568 -4.136606216  
N -6.732730389 -0.632377982 -3.055269957  
H 0.587620616 -4.114616394 -3.230014324  
H -1.007440805 -2.368892193 1.166189194  
N -1.809511542 0.607741356 -1.147946358  
C -0.059850764 2.416061163 -3.227460146  
H -0.385908991 3.362325907 -2.788688898  
H 0.443547398 2.557818174 -4.188463211  
H -2.145699739 2.078930140 -5.728109837  
H 1.875636220 0.795043886 -3.834640741  
O -2.868406057 3.290171146 -3.943180561  
O -2.653065681 2.834056854 -6.130351067  
C -3.091549873 3.582891464 -5.125062943  
C -3.891990185 4.780898094 -5.534759045  
H -4.879836082 4.447897911 -5.870947838  
H -4.009784222 5.454822063 -4.687230110  
H -3.410648823 5.287387371 -6.373856544

1

=====  
N -1.075199127 0.094438627 -4.464340210  
Pd -2.259872675 1.515815735 -3.340083838  
N 0.414132327 1.674081206 -2.553094625  
N -3.794940233 -0.145178378 -3.646666288  
C 0.260144234 0.037047554 -4.488769054  
C -1.820057034 -0.890333652 -5.012926102  
C 0.444101006 0.863281250 -1.324873805  
C 1.048153400 1.123084903 -3.731717825  
C -3.340433359 -0.793396831 -4.895326138  
C -3.794721127 -1.047507524 -2.453163624  
C -5.053304672 0.623326719 -3.756424904  
C -2.388478994 -1.375911951 -1.975399733  
C -0.340534210 -0.447141469 -1.415722847  
C -1.854402184 -2.664615393 -2.001616955  
H -2.470869303 -3.514315605 -2.278107166  
C -0.502577066 -2.828438520 -1.687948585  
C 0.276563764 -1.702315331 -1.423130870  
H 1.343247771 -1.792067051 -1.241227388  
H 1.491143703 0.647971153 -1.083958983  
H 0.033719700 1.477615118 -0.518395126  
H 2.019339085 0.700324357 -3.453310728  
C 0.922662556 -0.983192146 -5.173040867  
H 2.007860184 -1.004361749 -5.195168972  
C 0.172989026 -1.976706028 -5.795889378  
C -1.218135357 -1.945285678 -5.692708492  
H -1.827687502 -2.734019995 -6.121580124  
H -3.775395393 -1.796601176 -5.016459465  
H -4.319248199 -0.514293969 -1.655149221  
H -4.356757641 -1.965584993 -2.677380562  
H -3.699012518 -0.183925942 -5.731946468

H -5.095133781 1.048641324 -4.764935017  
H -5.942086697 -0.012454848 -3.633270502  
C -5.111489773 1.783138633 -2.766930342  
C -6.301459312 2.121408463 -2.128839731  
C -6.342826843 3.241517067 -1.297240019  
C -4.023333073 3.589894772 -1.776410818  
C -5.183984280 3.993489742 -1.122490287  
H -7.186660767 1.513418674 -2.285960913  
H -7.263628006 3.516647577 -0.792730629  
H -3.091296673 4.133117676 -1.661507964  
H -5.169138908 4.872693062 -0.487767816  
N -3.981778145 2.513246298 -2.577850580  
H 0.665097415 -2.785836697 -6.326855183  
H -0.054548942 -3.817515850 -1.692954063  
N -1.653949738 -0.312457055 -1.623045683  
C -0.635136008 2.604938269 -2.760830164  
H -0.894241750 3.125349760 -1.833594084  
H -0.384533405 3.308387995 -3.560918570  
H 1.246678233 1.945606232 -4.430617332

=====

## 2-TS

=====

N -1.150872827 -0.167095721 -4.412861824  
Pd -2.346019506 1.449089646 -3.677165031  
N 0.460081607 1.752683520 -2.942257166  
N -3.832481384 -0.190909401 -3.524997234  
C 0.187190816 -0.216199934 -4.500260353  
C -1.892528296 -1.254024267 -4.725597858  
C 0.520314276 1.204868197 -1.578168154  
C 1.024913073 0.978972495 -4.020789623  
C -3.391448021 -1.163511276 -4.567004681

C -3.803539991 -0.756605268 -2.121933460  
C -5.180797577 0.357721716 -3.849772453  
C -2.395050526 -1.008210897 -1.633591771  
C -0.303363502 -0.059569661 -1.362145782  
C -1.905586600 -2.286570072 -1.357197165  
H -2.563074589 -3.148976803 -1.403227448  
C -0.551734984 -2.426539421 -1.046536684  
C 0.272672564 -1.301060915 -1.077807426  
H 1.340510726 -1.386098981 -0.900457740  
H 1.573275447 1.005098820 -1.348732471  
H 0.175639540 1.987281084 -0.896690130  
H 2.005338907 0.595882356 -3.717883110  
C 0.832665622 -1.342105627 -5.010964394  
H 1.915446639 -1.350933313 -5.086347103  
C 0.079875804 -2.448632002 -5.391867161  
C -1.301631093 -2.413551092 -5.220977306  
H -1.919717431 -3.272750616 -5.459047794  
H -3.817816019 -2.151734352 -4.370995998  
H -4.271837234 -0.001196277 -1.485397816  
H -4.410931587 -1.663964152 -2.100923538  
H -3.810343742 -0.822209716 -5.520812035  
H -5.437235832 1.061351657 -3.052890539  
H -5.071235180 0.966187537 -4.752470970  
C -6.309792995 -0.643748820 -4.062277794  
C -7.477864742 -0.203298658 -4.696124554  
C -8.526771545 -1.101206422 -4.871485710  
C -7.172162533 -2.760562897 -3.807238340  
C -8.373620033 -2.412164211 -4.418250084  
H -7.559328556 0.822753787 -5.043484688  
H -9.444746971 -0.786504209 -5.358639717  
H -7.009394646 -3.772992611 -3.443913698  
H -9.162908554 -3.147038221 -4.536458015

N -6.157251835 -1.901774406 -3.627573013  
 H 0.564541161 -3.336899996 -5.785456181  
 H -0.137832910 -3.405020714 -0.821868539  
 N -1.614873409 0.077724069 -1.572188735  
 C -0.460509807 2.751969337 -3.288183212  
 H -0.795784354 3.331192255 -2.430147648  
 H -0.047289107 3.412693977 -4.057667732  
 H 1.193632364 1.645626664 -4.876291752

C -3.451373577 4.035028458 -3.774424553  
 O -3.722772360 2.906429052 -3.206007242  
 O -2.410316706 4.234006405 -4.443867683  
 C -4.482335567 5.126350880 -3.607869864  
 H -5.296760082 4.948678017 -4.318365097  
 H -4.903553486 5.101124763 -2.601142168  
 H -4.038312912 6.099042416 -3.818845749  
 H -1.622451663 2.914240837 -4.157102585

### Vibrational Frequencies (in $\text{cm}^{-1}$ ) of the Optimized Geometries

|                                                 |                                                 |
|-------------------------------------------------|-------------------------------------------------|
| =====                                           | 345.33 352.54 376.10 395.59 403.59 418.62       |
| Acetonitrile                                    | 427.78 438.36 444.48 456.28 471.33 519.30       |
| =====                                           | 560.47 574.25 612.86 628.09 637.20 647.29       |
| 386.47 386.62 932.39 1061.24 1061.28 1420.16    | 682.37 687.88 745.46 750.73 764.43 771.21       |
| 1482.72 1483.05 2378.66 3058.52 3135.65 3136.10 | 778.31 783.78 827.25 836.57 850.17 875.01       |
| =====                                           | 888.82 910.77 914.12 925.32 926.77 942.96       |
| Acetate                                         | 962.04 975.66 986.31 989.11 995.91 998.82       |
| =====                                           | 1010.85 1011.26 1013.81 1015.14 1019.66 1024.47 |
| 52.38 426.26 585.83 627.07 861.01 990.43        | 1051.84 1075.19 1116.30 1119.99 1122.34 1140.49 |
| 1021.74 1320.31 1375.74 1480.18 1494.11 1758.12 | 1148.21 1151.21 1165.07 1184.12 1186.62 1192.92 |
| 2990.68 3053.72 3078.41                         | 1210.86 1222.69 1248.54 1255.15 1256.01 1269.78 |
| =====                                           | 1276.46 1282.96 1287.06 1302.70 1310.75 1326.08 |
| Acetic_acid                                     | 1334.49 1340.83 1357.97 1371.64 1381.28 1397.73 |
| =====                                           | 1412.31 1420.71 1470.07 1471.37 1480.68 1486.72 |
| 89.37 422.57 541.31 583.80 677.23 866.46        | 1488.62 1489.98 1496.87 1498.62 1502.13 1502.42 |
| 1003.28 1069.83 1218.41 1354.62 1421.91 1482.70 | 1510.74 1514.91 1520.69 1521.99 1628.07 1635.16 |
| 1488.33 1857.10 3066.02 3132.70 3184.88 3755.76 | 1638.70 1644.27 1645.51 1647.15 2939.06 2970.47 |
| =====                                           | 2983.23 2991.07 3001.95 3017.87 3057.75 3059.47 |
| PicCH3N4                                        | 3064.70 3069.62 3071.90 3082.12 3110.35 3162.61 |
| =====                                           | 3177.98 3178.39 3183.00 3198.60 3199.56 3205.21 |
| 15.97 23.60 51.34 57.85 72.35 78.52             | 3212.03 3213.25 3216.83                         |
| 97.09 104.04 122.95 174.52 193.88 208.45        | =====                                           |
| 245.71 250.11 261.50 267.06 295.42 323.40       | Protonated_ligand                               |

=====

14.99 24.39 37.21 48.81 60.67 85.04

97.55 101.43 125.89 180.50 200.44 217.38

229.43 239.36 255.63 286.98 298.46 323.21

341.78 371.61 383.23 411.57 418.10 421.94

428.22 444.88 448.32 469.72 488.47 525.69

553.69 566.52 609.57 626.35 627.75 646.12

650.45 687.37 740.63 749.03 769.15 773.31

777.21 789.97 816.19 832.06 857.28 875.08

884.47 914.37 922.96 929.07 935.46 938.98

946.72 969.38 979.34 983.60 987.17 1001.49

1013.02 1013.72 1015.38 1016.15 1018.26 1024.00

1027.14 1076.56 1086.57 1115.72 1121.38 1123.45

1148.85 1149.98 1163.42 1187.28 1190.17 1196.21

1198.71 1219.91 1235.97 1246.71 1255.02 1260.51

1274.72 1285.10 1289.44 1312.81 1313.85 1314.06

1336.89 1348.91 1353.12 1368.62 1380.08 1390.63

1409.77 1428.92 1434.84 1469.95 1475.43 1475.87

1481.77 1491.04 1493.01 1499.29 1502.55 1504.85

1509.94 1511.00 1514.70 1519.22 1521.64 1536.01

1627.88 1628.93 1632.85 1646.41 1652.25 1656.30

2873.53 2990.32 3004.72 3017.70 3079.41 3086.53

3088.57 3095.27 3100.40 3102.70 3139.74 3158.01

3174.37 3175.16 3181.50 3188.94 3194.12 3197.57

3203.08 3207.08 3210.93 3216.71 3220.04 3225.64

=====

**2**

=====

26.29 40.47 42.11 48.65 61.52 67.88

76.33 78.85 86.79 100.20 127.43 131.53

157.53 192.67 195.35 201.84 206.02 212.58

235.42 246.62 252.91 259.85 277.35 293.90

297.59 310.47 321.44 341.76 355.56 388.97

412.63 417.14 422.74 437.03 457.04 461.34

468.39 482.50 497.45 514.99 522.40 559.01

578.68 612.25 616.20 643.84 648.80 665.88

671.97 683.95 692.55 737.86 742.86 749.20

775.55 781.34 788.17 812.88 824.29 841.87

880.74 892.77 916.92 919.28 927.42 928.01

953.60 962.82 965.52 975.93 991.88 1005.67

1012.76 1015.47 1018.84 1020.02 1021.47 1029.70

1042.37 1044.07 1052.89 1063.34 1073.26 1079.64

1091.30 1103.35 1125.78 1136.50 1142.65 1157.40

1171.31 1196.27 1198.61 1204.95 1218.02 1235.19

1236.95 1244.87 1259.64 1267.96 1276.16 1287.71

1292.12 1307.45 1310.74 1318.44 1326.38 1338.93

1344.14 1356.01 1385.62 1397.87 1399.28 1406.35

1422.70 1427.51 1468.68 1471.66 1478.60 1478.86

1484.14 1485.48 1487.61 1489.76 1497.23 1500.33

1502.22 1504.25 1510.88 1511.95 1519.91 1521.94

1625.66 1629.48 1633.87 1646.43 1657.77 1661.81

1733.21 2943.25 2947.17 2962.42 3037.99 3046.66

3052.96 3058.65 3074.28 3093.15 3103.21 3106.90

3110.44 3113.42 3126.00 3148.83 3172.68 3191.46

3199.76 3204.44 3207.81 3213.03 3216.05 3219.00

3224.23 3224.29 3235.63

**A1**

=====

22.38 33.01 36.75 46.14 58.82 64.12

78.67 89.96 102.10 133.46 151.70 164.16

184.13 191.46 204.17 208.19 218.85 226.51

241.92 254.51 265.59 268.26 284.17 291.03

301.77 314.91 334.15 342.57 393.72 407.95

412.24 415.78 428.23 432.28 447.99 459.01

463.69 468.23 486.79 501.27 517.54 546.24

568.01 619.16 635.66 647.50 656.55 661.32

683.92 727.69 746.98 747.74 774.51 783.95



787.44 812.70 826.03 842.47 868.66 894.57  
913.96 923.21 934.39 943.94 950.01 965.31  
969.95 983.72 984.91 993.68 1011.77 1019.49  
1021.42 1025.25 1031.54 1037.24 1037.83 1039.54  
1044.41 1048.65 1049.62 1088.98 1098.82 1122.89  
1139.68 1143.03 1165.71 1169.03 1187.75 1197.91  
1198.27 1205.46 1211.96 1229.46 1246.55 1250.35  
1252.74 1268.30 1279.41 1285.57 1294.77 1304.73  
1309.45 1323.51 1337.86 1344.44 1372.32 1391.59  
1401.07 1405.94 1410.73 1420.91 1436.75 1460.50  
1460.72 1470.55 1473.68 1479.83 1481.61 1484.02  
1489.02 1496.06 1500.98 1503.94 1508.74 1510.51  
1514.18 1515.90 1524.08 1621.03 1625.33 1634.20  
1647.59 1653.86 1656.80 2391.32 2983.13 3001.94  
3007.24 3049.47 3052.77 3058.00 3058.16 3059.74  
3081.70 3092.67 3099.36 3122.39 3143.77 3144.67  
3144.72 3186.79 3199.95 3207.08 3209.36 3210.11  
3218.26 3218.99 3219.17 3223.74 3227.28 3236.18

=====

**A2**

=====

42.34 66.29 72.73 85.08 98.89 104.01  
145.83 176.63 191.47 195.34 209.89 221.24  
239.46 254.56 263.85 271.78 277.15 290.29  
323.07 327.37 336.98 359.51 409.54 423.50  
427.60 431.40 438.37 455.53 466.58 480.11  
486.10 496.64 524.44 536.99 581.15 623.17  
640.42 655.22 658.31 667.27 670.42 729.26  
739.92 748.75 772.10 784.08 787.87 798.50  
818.23 827.42 842.04 862.53 914.00 921.78  
934.03 939.87 948.29 960.80 969.71 980.67  
989.07 993.51 1018.11 1020.42 1025.72 1034.24  
1040.43 1041.55 1043.75 1063.31 1070.94 1082.64  
1096.62 1103.86 1113.99 1126.14 1146.80 1158.65

1189.83 1193.53 1206.55 1209.46 1219.36 1235.02  
1243.13 1246.81 1262.43 1270.95 1285.44 1290.83  
1305.15 1315.91 1318.16 1325.83 1334.30 1353.23  
1381.05 1389.97 1395.14 1408.87 1419.65 1464.92  
1469.42 1475.09 1476.94 1478.15 1485.50 1496.30  
1497.99 1501.28 1504.55 1507.26 1513.69 1517.56  
1521.41 1619.85 1626.89 1630.69 1639.00 1652.19  
1656.81 3043.96 3052.07 3057.55 3061.68 3062.44  
3076.35 3100.89 3108.68 3113.11 3130.93 3134.87  
3142.20 3169.58 3202.89 3208.81 3212.93 3213.11  
3221.53 3221.54 3222.85 3228.33 3228.46 3240.23

=====

**A3**

=====

41.06 54.16 61.57 79.84 89.19 99.63  
134.22 169.83 184.86 186.79 207.21 230.02  
239.93 246.60 256.81 264.68 281.42 306.11  
326.23 339.38 359.48 397.37 408.42 422.57  
427.18 434.25 458.87 461.18 470.19 488.28  
499.38 506.68 524.50 540.40 561.99 604.98  
636.18 643.27 665.16 669.61 683.24 726.66  
738.49 740.38 764.82 781.24 786.14 812.17  
824.07 836.65 868.27 880.60 913.88 923.60  
931.92 951.71 954.33 959.79 973.96 981.39  
984.21 993.63 1019.17 1029.07 1029.41 1033.74  
1037.11 1040.88 1047.14 1051.26 1071.25 1084.14  
1085.34 1104.89 1129.21 1144.48 1146.63 1199.88  
1202.35 1206.32 1209.32 1219.73 1232.29 1240.25  
1248.24 1255.94 1267.41 1270.07 1288.85 1291.54  
1299.02 1312.86 1321.44 1334.78 1348.59 1360.95  
1370.76 1388.95 1399.48 1404.11 1407.03 1429.03  
1445.40 1471.47 1473.26 1475.59 1480.04 1484.25  
1485.99 1498.21 1499.26 1501.32 1505.49 1513.23  
1521.21 1620.09 1624.53 1627.36 1642.26 1650.48

1656.75 2154.03 3053.04 3055.34 3059.76 3063.69  
3063.89 3084.99 3105.18 3106.36 3114.74 3120.54  
3124.16 3182.31 3203.07 3209.02 3209.85 3213.93  
3216.50 3221.64 3223.46 3226.79 3229.15 3240.59

=====  
**A3-TS'**  
=====

-581.32 36.23 48.30 65.61 81.44 87.33  
112.32 147.55 173.13 182.29 203.48 217.66  
226.90 237.68 241.92 253.03 270.24 280.96  
308.54 341.74 356.90 375.86 391.74 424.21  
436.56 447.71 452.99 461.10 463.61 483.05  
494.27 512.34 526.71 541.68 553.69 607.71  
640.78 643.40 658.43 670.73 677.93 714.80  
733.46 738.75 748.87 765.06 779.02 786.54  
814.71 818.07 842.41 876.53 889.50 894.79  
913.47 928.69 934.96 958.61 961.47 966.47  
975.38 985.54 987.13 999.91 1015.76 1031.37  
1031.71 1034.44 1039.70 1041.44 1050.03 1085.19  
1095.32 1111.57 1117.80 1129.30 1141.72 1147.69  
1152.73 1203.37 1206.71 1209.26 1221.12 1233.93  
1241.47 1246.20 1254.94 1258.56 1267.46 1271.78  
1295.18 1297.40 1315.55 1321.75 1338.19 1346.67  
1370.10 1376.58 1396.15 1398.59 1407.73 1425.85  
1442.33 1472.87 1476.10 1478.27 1481.42 1487.12  
1489.39 1494.48 1501.65 1503.72 1508.39 1522.04  
1530.14 1621.28 1626.01 1633.46 1643.73 1651.17  
1658.94 2088.02 3049.75 3051.51 3058.07 3058.40  
3069.97 3099.60 3103.17 3108.99 3119.53 3121.93  
3129.65 3206.10 3208.91 3213.42 3216.26 3218.76  
3221.92 3223.46 3223.69 3228.48 3228.93 3239.13

=====  
**A3-TS**  
=====

-140.86 40.28 57.60 64.83 74.87 88.51  
112.09 142.68 164.89 185.30 196.55 203.85  
225.61 230.74 244.60 259.74 277.51 285.81  
302.13 335.24 339.89 366.88 407.60 416.93  
429.88 432.99 453.30 458.47 464.80 475.35  
491.34 508.21 527.89 548.40 575.34 603.83  
641.47 649.14 657.72 670.20 694.32 726.08  
735.11 744.28 747.94 773.87 785.33 788.17  
814.28 829.60 846.21 870.63 887.95 894.86  
916.68 926.12 938.72 954.33 963.53 965.68  
978.90 983.84 991.46 1004.68 1018.19 1027.88  
1029.35 1031.49 1034.79 1038.33 1039.83 1049.13  
1067.93 1085.87 1100.73 1120.96 1131.73 1147.69  
1149.63 1200.83 1205.54 1208.59 1213.77 1235.18  
1240.15 1246.79 1263.29 1269.41 1270.52 1285.03  
1292.78 1295.34 1310.57 1321.24 1334.95 1348.41  
1352.49 1385.94 1397.38 1404.29 1410.27 1432.55  
1473.54 1477.44 1480.55 1482.54 1484.33 1487.19  
1498.07 1500.29 1501.64 1505.57 1508.32 1519.47  
1620.36 1623.41 1629.43 1641.22 1649.86 1657.15  
1658.32 2026.49 3045.88 3047.91 3056.42 3081.73  
3084.45 3098.96 3108.39 3113.75 3138.07 3140.31  
3188.55 3203.96 3209.45 3210.22 3212.78 3216.21  
3222.92 3223.18 3227.42 3232.42 3249.30 3303.93

=====  
**A4**  
=====

40.58 55.13 66.54 75.33 82.21 99.11  
124.78 126.54 173.00 188.18 197.66 203.42  
234.78 239.65 251.08 264.76 286.55 290.51  
317.49 339.97 354.37 402.52 409.67 426.12  
433.64 448.32 460.18 468.51 471.04 490.22  
511.50 521.24 558.57 567.72 590.24 639.89  
643.57 651.70 663.39 671.96 686.26 707.18

737.44 742.41 749.11 780.49 784.50 790.73  
811.46 826.93 844.68 862.23 885.46 897.14  
919.06 927.30 939.42 947.35 961.51 967.27  
970.79 987.87 994.32 1000.74 1009.33 1021.09  
1030.40 1032.19 1035.86 1038.32 1043.40 1051.18  
1064.26 1084.80 1098.93 1119.71 1131.99 1142.66  
1147.95 1202.25 1204.40 1205.33 1209.12 1228.56  
1238.63 1244.78 1261.04 1266.84 1268.22 1276.78  
1288.54 1305.74 1311.09 1320.89 1334.76 1341.01  
1347.68 1379.16 1389.15 1399.88 1410.61 1432.49  
1470.78 1479.55 1484.63 1486.60 1488.16 1490.49  
1498.52 1501.57 1502.72 1509.36 1512.42 1518.68  
1618.07 1621.79 1630.70 1639.64 1652.91 1658.21  
1720.30 2042.41 3041.70 3046.23 3052.52 3085.69  
3099.27 3100.60 3105.76 3110.34 3144.22 3163.08  
3181.40 3201.66 3209.34 3209.90 3212.24 3216.44  
3222.04 3222.64 3226.79 3231.94 3249.34 3302.85

=====

**A4-TS**

=====

-137.78 42.52 50.54 65.49 80.02 83.13  
113.87 155.18 165.56 186.53 201.38 209.87  
224.36 232.45 244.06 256.75 275.20 286.42  
307.46 342.39 346.88 397.34 403.46 422.49  
429.61 438.29 454.74 460.11 468.89 483.09  
505.07 519.50 542.95 560.59 563.57 603.59  
642.98 647.43 660.19 671.60 690.16 727.29  
731.15 743.74 768.64 776.48 786.97 791.02  
809.88 817.59 830.38 843.09 878.85 891.45  
916.83 925.81 938.13 956.82 963.36 970.23  
975.23 982.08 990.27 1003.43 1007.29 1016.59  
1030.68 1030.73 1033.23 1039.76 1041.81 1043.43  
1050.81 1086.24 1116.44 1125.30 1135.47 1144.71  
1149.56 1202.13 1206.32 1207.12 1211.94 1231.58

1239.99 1245.41 1263.06 1265.32 1268.91 1281.56  
1292.60 1293.78 1309.49 1319.36 1337.06 1351.47  
1355.09 1380.67 1392.97 1399.12 1410.89 1432.25  
1473.16 1476.39 1479.60 1485.06 1486.52 1487.99  
1496.23 1501.00 1501.93 1504.20 1509.16 1519.39  
1618.85 1620.36 1622.24 1631.32 1644.80 1652.53  
1657.28 2111.91 3035.30 3043.01 3050.72 3081.04  
3087.39 3093.59 3096.74 3104.34 3134.69 3147.70  
3185.28 3204.30 3211.24 3211.27 3212.75 3218.15  
3222.85 3223.31 3227.73 3230.00 3241.63 3306.37

=====

**A5**

=====

38.32 48.85 70.43 92.22 95.00 113.35  
173.55 180.18 183.55 205.63 223.26 233.86  
238.59 251.67 260.19 279.03 295.92 307.05  
344.08 357.01 385.29 405.93 426.62 435.73  
448.13 456.18 464.98 466.38 484.30 501.37  
514.60 522.56 540.30 545.48 604.81 641.02  
645.61 659.83 669.95 679.69 726.47 727.70  
732.43 741.92 763.35 778.63 785.71 813.04  
816.50 837.23 837.51 852.34 880.53 900.36  
913.94 926.71 937.01 957.71 964.93 967.84  
979.55 985.20 987.14 1000.98 1018.08 1033.46  
1035.07 1035.46 1040.76 1042.28 1047.96 1082.38  
1090.71 1114.44 1127.81 1134.18 1142.45 1144.17  
1153.28 1206.85 1207.17 1207.82 1223.25 1228.00  
1239.69 1241.69 1255.43 1257.28 1265.51 1272.96  
1294.65 1295.72 1307.44 1316.56 1339.47 1354.51  
1371.81 1374.81 1392.39 1397.66 1409.37 1425.00  
1442.81 1472.04 1475.02 1479.40 1482.89 1485.05  
1488.54 1494.34 1501.75 1503.51 1508.96 1521.28  
1534.81 1620.94 1624.08 1626.75 1647.40 1649.63  
1656.54 2123.23 3041.66 3044.01 3047.80 3064.05

3067.74 3092.21 3095.27 3101.01 3121.22 3124.41  
3128.04 3208.14 3209.71 3212.51 3215.32 3216.97  
3220.02 3222.17 3225.06 3226.50 3227.78 3239.12

=====

**A5-TS**

=====

-55.19 18.94 29.96 38.03 43.72 46.19  
48.86 50.58 55.14 62.77 72.75 78.85  
85.59 91.76 95.88 101.51 103.13 108.06  
112.91 117.26 130.52 154.97 176.22 182.10  
183.46 204.68 208.42 222.06 223.96 233.16  
239.80 245.99 254.63 257.45 261.46 270.90  
274.76 290.98 300.99 303.60 310.21 314.59  
329.06 347.45 355.64 359.94 375.06 378.97  
399.13 399.64 404.73 414.97 422.40 426.99  
428.19 435.29 438.80 446.07 456.86 460.47  
465.54 469.14 473.00 488.91 507.47 520.03  
527.65 530.09 545.38 550.67 559.52 575.69  
606.95 617.42 637.81 642.35 644.51 645.76  
655.43 661.41 668.72 670.08 684.90 692.76  
695.99 728.03 736.74 738.01 740.73 748.58  
763.36 768.78 778.65 780.36 781.63 785.33  
792.86 810.47 818.17 833.27 836.65 841.32  
847.70 866.95 878.83 890.89 891.53 898.97  
902.38 911.34 914.53 921.42 922.91 934.48  
935.30 946.35 950.34 954.80 966.33 967.52  
969.05 970.27 975.65 982.90 986.65 989.94  
996.23 1004.87 1013.14 1015.38 1016.86 1019.06  
1020.43 1023.86 1024.32 1027.35 1027.68 1028.16  
1028.98 1029.23 1030.22 1044.82 1049.49 1051.97  
1081.52 1085.75 1093.69 1105.73 1118.61 1119.95  
1121.85 1128.83 1133.71 1136.60 1139.73 1143.45  
1147.01 1152.58 1155.20 1160.47 1193.24 1195.79  
1199.08 1202.41 1203.99 1205.71 1217.56 1220.04

1222.80 1233.90 1238.07 1238.91 1241.70 1251.60  
1252.39 1258.01 1266.22 1269.17 1270.22 1275.86  
1277.44 1290.66 1292.13 1295.95 1298.93 1306.11  
1309.46 1315.55 1320.08 1326.97 1329.57 1335.38  
1350.87 1358.86 1361.08 1374.28 1378.47 1380.49  
1395.04 1402.62 1403.27 1411.04 1415.37 1425.18  
1427.61 1443.14 1444.99 1462.68 1471.65 1473.14  
1476.43 1478.71 1479.29 1481.42 1484.24 1487.51  
1489.76 1492.21 1492.57 1496.37 1497.55 1498.74  
1500.39 1501.70 1503.85 1504.27 1509.86 1518.81  
1519.66 1520.62 1524.37 1526.45 1532.68 1615.46  
1623.43 1625.16 1630.54 1631.42 1638.23 1645.61  
1647.70 1650.01 1650.18 1652.02 1660.58 1869.50  
2947.69 2957.92 2959.08 2960.02 2967.83 2985.54  
3016.93 3031.78 3039.46 3042.73 3053.74 3057.40  
3066.02 3067.46 3067.62 3073.22 3074.43 3087.33  
3098.22 3107.74 3111.84 3112.88 3118.19 3121.36  
3178.93 3194.06 3195.09 3204.34 3204.47 3204.59  
3205.49 3206.29 3211.57 3212.46 3212.64 3215.61  
3215.97 3216.88 3217.83 3220.34 3222.54 3222.64  
3224.00 3230.50 3235.47

=====

**A6**

=====

20.53 23.72 46.96 47.79 51.71 56.58  
59.96 61.82 73.55 91.11 125.76 144.19  
159.05 168.38 179.24 187.66 197.88 204.73  
228.70 240.61 245.72 265.41 284.79 304.47  
312.66 343.65 349.91 387.45 415.39 420.52  
439.53 449.05 460.46 468.79 474.67 476.26  
512.22 519.25 521.62 541.70 547.09 550.24  
614.59 616.41 623.19 644.06 661.83 665.69  
687.93 697.77 705.25 731.55 741.07 759.71  
770.50 777.83 788.17 810.90 814.92 822.36

841.52 853.33 889.86 903.52 915.96 920.09  
 929.44 947.91 956.93 964.34 966.64 977.30  
 988.67 992.42 999.86 1015.27 1020.53 1020.95  
 1022.52 1023.10 1033.13 1034.16 1042.14 1065.99  
 1078.54 1096.04 1112.20 1124.24 1132.16 1137.00  
 1138.93 1143.86 1193.41 1201.02 1202.47 1210.99  
 1221.60 1235.25 1246.49 1252.27 1258.31 1272.70  
 1277.16 1296.08 1307.13 1309.90 1320.69 1322.97  
 1339.06 1346.59 1373.18 1380.10 1390.21 1396.82  
 1398.57 1413.66 1425.10 1432.86 1471.19 1475.74  
 1476.85 1478.30 1479.43 1486.00 1488.27 1488.70  
 1493.44 1501.09 1502.39 1512.49 1522.34 1523.36  
 1628.26 1629.20 1631.54 1647.47 1649.92 1654.08  
 1683.98 2107.21 3046.94 3050.11 3059.85 3063.57  
 3066.41 3069.45 3092.76 3107.89 3110.65 3112.58  
 3113.93 3115.52 3135.56 3173.29 3180.56 3191.40  
 3200.02 3201.46 3205.49 3207.39 3210.20 3212.18  
 3219.92 3219.96 3222.45

=====

**A6-TS**

=====

-39.90 17.47 35.58 48.06 50.46 52.90  
 59.34 60.34 68.98 91.21 127.38 139.20  
 158.93 165.48 178.32 184.05 193.65 201.91  
 228.51 240.81 245.39 263.38 284.67 303.93  
 312.89 341.74 348.96 388.67 414.83 421.29  
 437.88 448.47 459.76 468.58 473.94 476.80  
 507.65 511.94 519.49 541.82 547.82 551.85  
 614.15 615.60 624.71 643.89 655.65 661.77  
 667.76 698.50 705.31 731.43 741.45 757.95  
 771.71 777.17 788.19 810.74 816.72 838.13  
 840.51 849.87 889.54 902.44 914.85 919.39  
 929.27 955.16 957.43 964.71 967.54 977.43  
 989.37 992.89 1001.04 1015.66 1019.89 1021.76

1022.28 1022.82 1032.39 1036.28 1041.75 1066.29  
 1078.27 1095.52 1113.04 1124.96 1132.00 1137.71  
 1138.47 1143.87 1193.30 1200.40 1201.86 1209.29  
 1220.62 1234.04 1245.90 1252.16 1258.58 1273.31  
 1277.52 1296.13 1307.80 1311.71 1323.56 1337.29  
 1340.72 1346.34 1371.76 1380.02 1390.97 1395.91  
 1400.63 1412.97 1423.41 1431.70 1471.20 1475.54  
 1476.89 1477.67 1478.92 1486.59 1489.91 1490.35  
 1493.87 1501.22 1502.27 1512.96 1520.95 1524.26  
 1628.49 1629.66 1631.80 1648.64 1649.26 1653.82  
 1655.64 2003.98 3048.03 3050.36 3060.57 3062.97  
 3067.98 3068.65 3094.62 3107.17 3109.59 3110.50  
 3111.40 3116.26 3139.87 3174.01 3181.56 3191.04  
 3199.70 3202.14 3202.73 3205.88 3210.41 3212.91  
 3220.02 3220.88 3223.27

=====

**A7**

=====

17.41 22.46 35.88 44.76 52.99 54.43  
 58.86 68.05 70.57 72.75 104.23 120.79  
 138.76 153.15 163.09 190.00 191.21 208.02  
 218.35 222.62 245.37 250.15 262.35 278.49  
 306.39 334.40 388.44 401.67 412.90 419.98  
 431.61 437.80 449.88 457.97 466.83 472.73  
 476.13 506.18 532.36 543.75 551.61 559.86  
 586.38 610.85 616.33 639.29 651.37 653.62  
 670.06 693.21 730.19 743.31 768.73 771.00  
 779.33 784.50 796.36 800.96 813.94 829.72  
 853.78 888.43 895.41 903.59 913.31 920.32  
 923.85 949.45 957.44 960.49 969.94 987.84  
 991.43 999.18 1010.22 1012.81 1015.73 1020.42  
 1022.56 1025.33 1033.75 1035.68 1071.48 1074.91  
 1086.07 1094.86 1111.24 1126.87 1135.92 1140.89  
 1143.16 1192.24 1194.60 1195.62 1202.44 1218.19

1235.73 1247.05 1248.92 1260.78 1270.81 1274.97  
1284.45 1296.11 1308.96 1317.35 1322.30 1342.59  
1355.68 1366.04 1376.58 1384.36 1389.57 1392.89  
1405.99 1411.91 1432.09 1434.25 1470.91 1471.80  
1474.39 1474.62 1477.63 1482.93 1485.21 1487.12  
1489.28 1498.11 1499.42 1506.92 1509.89 1517.09  
1628.96 1631.02 1632.65 1642.26 1644.20 1652.76  
1727.09 3021.87 3041.79 3056.96 3057.20 3061.30  
3064.04 3069.53 3070.18 3098.64 3116.78 3118.47  
3124.06 3143.16 3145.29 3173.47 3187.63 3192.18  
3192.84 3198.16 3203.01 3203.13 3208.27 3213.74  
3218.90 3219.30 3300.23

=====

**1**

=====

37.67 60.69 68.17 76.70 90.87 98.50  
136.41 152.34 179.34 192.33 201.01 218.52  
236.94 247.14 256.31 264.99 283.93 299.50  
334.85 340.57 402.63 409.51 421.13 430.85  
434.92 446.12 459.75 465.97 482.80 500.56  
514.17 540.72 553.37 560.17 602.96 633.74  
641.17 659.91 665.91 687.24 726.38 736.93  
749.69 761.85 776.34 779.94 787.77 805.61  
825.18 834.85 875.72 879.72 913.19 914.65  
922.95 948.70 955.70 960.29 975.39 982.41  
987.02 995.76 1009.78 1014.60 1016.39 1022.92  
1024.29 1031.23 1035.25 1083.03 1091.59 1113.43  
1121.44 1127.91 1136.58 1138.69 1148.58 1184.67  
1192.41 1198.37 1200.10 1214.79 1232.39 1235.09  
1243.12 1256.95 1264.04 1269.07 1286.61 1300.05  
1310.30 1321.38 1336.65 1348.70 1362.64 1369.04  
1384.62 1390.45 1401.52 1407.24 1428.91 1467.51  
1469.40 1474.94 1479.15 1482.65 1484.69 1494.12  
1496.14 1497.63 1500.15 1505.85 1514.45 1622.94

1626.21 1630.64 1639.82 1651.44 1656.16 3011.52  
3017.56 3022.21 3040.33 3046.77 3057.10 3081.68  
3089.53 3094.44 3106.51 3116.18 3127.75 3193.06  
3197.44 3201.93 3202.70 3206.65 3210.32 3214.03  
3216.97 3217.78 3230.16

=====

**2-TS**

=====

-1019.80 6.52 25.37 38.81 46.06 56.87  
59.80 63.63 73.75 83.69 99.65 134.69  
142.62 151.92 171.21 179.62 188.24 199.16  
205.67 230.13 244.18 260.74 269.20 279.07  
294.56 311.45 323.39 329.30 387.87 409.28  
413.77 421.06 431.71 444.23 463.59 467.86  
472.09 480.05 502.42 519.65 529.55 542.86  
562.97 613.30 617.07 622.51 642.88 654.56  
672.72 699.60 703.57 733.19 741.94 754.10  
768.66 775.79 779.81 786.39 802.91 809.33  
832.07 840.33 886.21 905.96 912.94 917.93  
927.89 951.25 957.90 961.28 966.20 972.09  
987.47 997.18 1007.54 1014.57 1016.27 1019.71  
1020.42 1022.74 1035.92 1039.22 1041.25 1069.40  
1077.40 1086.83 1102.35 1115.42 1126.43 1136.16  
1139.53 1191.98 1193.70 1196.03 1204.81 1221.39  
1224.51 1238.61 1244.90 1253.99 1270.16 1277.49  
1282.36 1299.02 1309.66 1314.20 1325.93 1337.20  
1343.66 1368.36 1381.96 1387.33 1393.23 1398.28  
1406.10 1415.15 1422.86 1431.04 1468.74 1471.09  
1473.36 1474.87 1478.50 1484.43 1488.31 1491.85  
1495.14 1498.06 1501.18 1507.45 1516.07 1523.14  
1595.95 1629.82 1630.00 1633.22 1643.23 1649.00  
1655.22 1710.25 3039.96 3057.03 3057.19 3065.72  
3066.34 3076.90 3082.68 3093.57 3110.43 3119.05  
3119.68 3140.63 3143.83 3176.54 3182.52 3190.27  
3190.45 3194.04 3200.24 3204.08 3206.72 3210.56  
3215.02 3220.87 3221.82

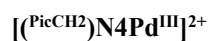


---

|    |           |           |           |
|----|-----------|-----------|-----------|
| Pd | 11.090089 | 8.733966  | 6.124636  |
| N  | 10.873363 | 7.989617  | 8.095336  |
| N  | 10.629816 | 9.237492  | 4.127956  |
| N  | 10.577143 | 10.631544 | 7.332801  |
| N  | 8.825380  | 8.656999  | 6.223964  |
| N  | 13.246926 | 9.524160  | 7.610511  |
| C  | 9.590712  | 7.667330  | 8.374082  |
| C  | 9.209643  | 7.382732  | 9.679850  |
| H  | 8.167049  | 7.135295  | 9.893495  |
| C  | 10.161450 | 7.447811  | 10.693307 |
| H  | 9.881160  | 7.231889  | 11.727312 |
| C  | 11.461815 | 7.829014  | 10.387454 |
| H  | 12.224462 | 7.939139  | 11.162498 |
| C  | 11.787393 | 8.109761  | 9.063009  |
| C  | 13.186716 | 8.562461  | 8.692897  |
| H  | 13.664015 | 8.995024  | 9.585248  |
| H  | 13.781013 | 7.677745  | 8.404492  |
| C  | 13.136331 | 9.080083  | 6.331390  |
| H  | 13.533865 | 8.068358  | 6.149938  |
| H  | 13.356798 | 9.832752  | 5.561353  |
| C  | 11.436802 | 9.792464  | 3.216581  |
| H  | 12.474384 | 9.969336  | 3.515043  |
| C  | 10.993665 | 10.134130 | 1.947295  |
| H  | 11.690413 | 10.573835 | 1.231095  |
| C  | 9.660019  | 9.905233  | 1.626368  |

|   |           |           |           |
|---|-----------|-----------|-----------|
| H | 9.273517  | 10.174370 | 0.640310  |
| C | 8.820590  | 9.339368  | 2.579781  |
| H | 7.765363  | 9.149957  | 2.367396  |
| C | 9.331405  | 8.999476  | 3.828468  |
| C | 8.468537  | 8.301740  | 4.849621  |
| H | 7.403557  | 8.501004  | 4.628148  |
| H | 8.618023  | 7.214279  | 4.729889  |
| C | 8.344278  | 9.990561  | 6.607366  |
| H | 7.330579  | 9.928433  | 7.044660  |
| H | 8.257428  | 10.596826 | 5.687725  |
| C | 9.261647  | 10.725606 | 7.551589  |
| C | 8.775748  | 11.472872 | 8.622323  |
| H | 7.698524  | 11.532428 | 8.796660  |
| C | 9.686322  | 12.100216 | 9.466962  |
| H | 9.336114  | 12.682604 | 10.322904 |
| C | 11.051121 | 11.943563 | 9.244847  |
| H | 11.792871 | 12.380599 | 9.918187  |
| C | 11.466791 | 11.177478 | 8.157601  |
| C | 12.942603 | 10.910939 | 7.907261  |
| H | 13.277800 | 11.525621 | 7.055041  |
| H | 13.516713 | 11.222229 | 8.792852  |
| C | 8.599563  | 7.618242  | 7.236104  |
| H | 8.704885  | 6.636720  | 6.741048  |
| H | 7.573702  | 7.663235  | 7.646662  |

| Complex                                       | $[(^{\text{PicCH}_2})\text{N}_4\text{Pd}^{\text{III}}]^{2+}$                       |          |
|-----------------------------------------------|------------------------------------------------------------------------------------|----------|
| Spin Density                                  | 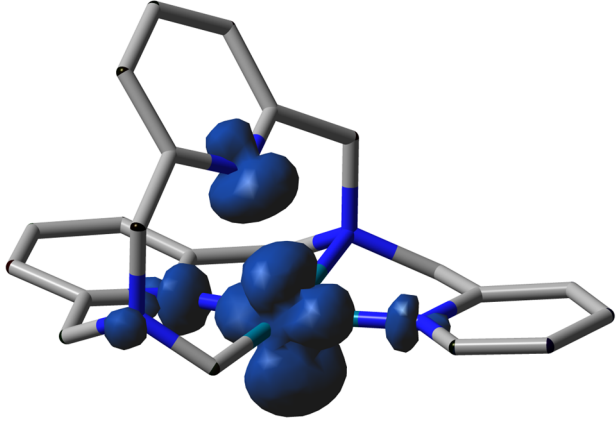 |          |
|                                               | Pd 0.682                                                                           | 3N 0.238 |
| <b><i>g</i> values (expt)</b>                 | 2.056; 2.083; 2.277                                                                |          |
| <b><i>g</i> values (calcd)</b>                | 2.073; 2.107; 2.312                                                                |          |
| <b><i>A<sub>N</sub></i> values (G, expt)</b>  | 18; 19; 5                                                                          |          |
| <b><i>A<sub>N</sub></i> values (G, calcd)</b> | 9; 22; 5                                                                           |          |

**Figure S21.** DFT-calculated spin density and EPR parameters for the  $[(^{\text{PicCH}_2})\text{N}_4\text{Pd}^{\text{III}}]^{2+}$  complex.



## 8. References

1. Wessel, A. J.; Schultz, J. W.; Tang, F.; Duan, H.; Mirica, L. M., Improved synthesis of symmetrically & asymmetrically N-substituted pyridinophane derivatives. *Org. Biomol. Chem.* **2017**, *15*, 9923-9931.
2. Dunlap, W. P.; Silver, N. C., Confidence intervals and standard errors for ratios of normal variables. *Beh. Res. Meth. Instr. Comp.* **1986**, *18*, 469-471.
3. Becke, A. D., Density-functional exchange-energy approximation with correct asymptotic behavior. *Phys. Rev. A* **1988**, *38*, 3098-3100.
4. Lee, C.; Yang, W.; Parr, R. G., Development of the Colle-Salvetti correlation-energy formula into a functional of the electron density. *Phys. Rev. B* **1988**, *37*, 785-789.
5. Ditchfield, R.; Hehre, W. J.; Pople, J. A., Self-Consistent Molecular-Orbital Methods. IX. An Extended Gaussian-Type Basis for Molecular-Orbital Studies of Organic Molecules. *J. Chem. Phys.* **1971**, *54*, 724-728.
6. Hehre, W. J.; Lathan, W. A., Self-Consistent Molecular Orbital Methods. XIV. An Extended Gaussian-Type Basis for Molecular Orbital Studies of Organic Molecules. Inclusion of Second Row Elements. *J. Chem. Phys.* **1972**, *56*, 5255-5257.
7. Rassolov, V. A.; Ratner, M. A.; Pople, J. A.; Redfern, P. C.; Curtiss, L. A., 6-31G\* basis set for third-row atoms. *J. Comput. Chem.* **2001**, *22*, 976-984.
8. Hay, P. J.; Wadt, W. R., Ab initio effective core potentials for molecular calculations. Potentials for the transition metal atoms Sc to Hg. *J. Chem. Phys.* **1985**, *82*, 270-283.
9. Wadt, W. R.; Hay, P. J., Ab initio effective core potentials for molecular calculations. Potentials for main group elements Na to Bi. *J. Chem. Phys.* **1985**, *82*, 284-298.
10. Hay, P. J.; Wadt, W. R., Ab initio effective core potentials for molecular calculations. Potentials for K to Au including the outermost core orbitals. *J. Chem. Phys.* **1985**, *82*, 299-310.
11. Jr., T. H. D., Gaussian basis sets for use in correlated molecular calculations. I. The atoms boron through neon and hydrogen. *J. Chem. Phys.* **1989**, *90*, 1007-1023.
12. LACV3P\*\*: a triple-zeta contraction of the LACVP basis set developed by Schrodinger Inc. The main group elements (H-Ar) are calculated employing 6-311G\*\*
13. Approximate dielectric environment offered by dimethylsulfoxide (DMSO) solvent.
